# Supplementary material for: Genome-wide association study of body fat distribution identifies adiposity loci and sex-specific genetic effects
Source: PubMed Central journal article supplement (PMC6341104; doi:10.1038/s41467-018-08000-4), 2019-01-21
Supplement: 41467_2018_8000_MOESM1_ESM.pdf [file 41467_2018_8000_MOESM1_ESM.pdf]

Genome-Wide Association Study of Body Fat Distribution identifies Adiposity Loci and Sex-Specific Genetic Effects

---

## Supplementary Figures and Tables

Rask-Andersen M et al.

[Table of contents:](#)

**Supplementary Table 1. Basic characteristics of UK Biobank participants included in the analyses.**

**Supplementary Table 2. SNP-heritability ( $h^2$ ) and LD score regression intercept estimates of body fat ratios.**

**Supplementary Figure 1. Quantile-quantile (QQ) plots of the distribution of P-values from GWAS of body fat ratios in the UK Biobank sex-combined, female and male discovery cohorts.**

**Supplementary Figure 2. Manhattan plots for GWAS results for arm fat ratio in the combined discovery cohort and sex-stratified analyses.**

**Supplementary Figure 3. Manhattan plots for GWAS results for leg fat ratio in the combined discovery cohort and sex-stratified analyses.**

**Supplementary Figure 4. Manhattan plots for GWAS results for trunk fat ratio in the combined discovery cohort and sex-stratified analyses.**

**Supplementary Table 3. Independent signals\* for association with body fat ratios in the combined cohort.**

**Supplementary Table 4. Independent signals for association with body fat ratios in females.**

**Supplementary Table 5. Independent signals for association with body fat ratios in males.**

**Supplementary Table 6. Direction of effect for body fat ratio-associated lead SNPs for standard anthropometric traits.**

**Supplementary Table 7. Overlap between body fat ratio-associated loci with non-anthropometric trait-associations from previous GWAS.**

**Supplementary Table 8. Phenotypic correlation between body fat ratios and anthropometric traits.**

**Supplementary Table 9. Genetic correlations between body fat ratios and anthropometric traits.**

**Supplementary Table 10. Body fat ratio-associated potentially damaging missense variants.**

**Supplementary Figure 5. Overlap of enriched gene sets from DEPICT for body fat ratios.**

**Supplementary Figure 6. Flowchart of the genetic analyses of body-fat ratios.**

**References**

**Supplementary Table 1. Basic characteristics of UK Biobank participants included in the analyses.** Data is presented for the discovery and replication cohorts. Mean values are presented  $\pm$  standard deviations. P-values denote results from student's t-tests for differences between females and males in the discovery and replication cohort, as well as differences between the replication and discovery cohorts. Bonferroni adjustment for multiple testing gives that  $P < 0.05/42$  can be considered significant.

|                                              | Discovery cohort |                 | Differences males/females (P) | Replication cohort |                  | Differences males/females (P) | Differences between discovery and replication (P) |                        |
|----------------------------------------------|------------------|-----------------|-------------------------------|--------------------|------------------|-------------------------------|---------------------------------------------------|------------------------|
|                                              | Males            | Females         |                               | Males              | Females          |                               | Males                                             | Females                |
| N                                            | 55,006           | 61,132          |                               | 112,425            | 133,936          |                               |                                                   |                        |
| Age (years)                                  | 57.5 $\pm$ 8.1   | 56.8 $\pm$ 7.9  | <2.2*10 <sup>-16</sup>        | 57.1 $\pm$ 8.1     | 56.7 $\pm$ 7.9   | <2.2*10 <sup>-16</sup>        | 1.8*10 <sup>-5</sup>                              | 0.004                  |
| Height (cm)                                  | 175.7 $\pm$ 6.7  | 162.6 $\pm$ 6.2 | <2.2*10 <sup>-16</sup>        | 176.0 $\pm$ 6.8    | 162.7 $\pm$ 6.2  | <2.2*10 <sup>-16</sup>        | <2.2*10 <sup>-16</sup>                            | 4.1*10 <sup>-6</sup>   |
| Weight (kg)                                  | 86.3 $\pm$ 14.5  | 71.8 $\pm$ 14.2 | <2.2*10 <sup>-16</sup>        | 86.1 $\pm$ 14.2    | 71.4 $\pm$ 13.9  | <2.2*10 <sup>-16</sup>        | 0.02                                              | 2.2*10 <sup>-8</sup>   |
| BMI (kg/m <sup>2</sup> )                     | 27.9 $\pm$ 4.3   | 27.2 $\pm$ 5.2  | <2.2*10 <sup>-16</sup>        | 27.8 $\pm$ 4.2     | 27.0 $\pm$ 5.12  | <2.2*10 <sup>-16</sup>        | 5.9*10 <sup>-12</sup>                             | 1.1*10 <sup>-13</sup>  |
| Waist circumference (cm)                     | 97.4 $\pm$ 11.5  | 85.0 $\pm$ 12.7 | <2.2*10 <sup>-16</sup>        | 96.9 $\pm$ 11.3    | 84.4 $\pm$ 12.4  | <2.2*10 <sup>-16</sup>        | 5.9*10 <sup>-13</sup>                             | <2.2*10 <sup>-16</sup> |
| Hip circumference (cm)                       | 103.6 $\pm$ 7.7  | 103.5 $\pm$ 7.5 | 0.73                          | 103.5 $\pm$ 7.6    | 103.3 $\pm$ 10.2 | 3.29*10 <sup>-9</sup>         | 0.01                                              | 6.4*10 <sup>-7</sup>   |
| Waist-to-hip ratio                           | 0.94 $\pm$ 0.1   | 0.82 $\pm$ 0.1  | <2.2*10 <sup>-16</sup>        | 0.93 $\pm$ 0.1     | 0.82 $\pm$ 0.1   | <2.2*10 <sup>-16</sup>        | <2.2*10 <sup>-16</sup>                            | <2.2*10 <sup>-16</sup> |
| <i>Impedance measurements</i>                |                  |                 |                               |                    |                  |                               |                                                   |                        |
| Total fat mass (kg)                          | 22.6 $\pm$ 8.4   | 27.2 $\pm$ 10.1 | <2.2*10 <sup>-16</sup>        | 22.3 $\pm$ 8.2     | 26.8 $\pm$ 10.0  | <2.2*10 <sup>-16</sup>        | 1.6*10 <sup>-9</sup>                              | 2.7*10 <sup>-11</sup>  |
| Leg fat mass (kg)                            | 6.3 $\pm$ 2.5    | 10.6 $\pm$ 3.6  | <2.2*10 <sup>-16</sup>        | 6.2 $\pm$ 2.5      | 10.4 $\pm$ 3.5   | <2.2*10 <sup>-16</sup>        | 5.3*10 <sup>-10</sup>                             | 8.7*10 <sup>-13</sup>  |
| Arm fat mass (kg)                            | 2.2 $\pm$ 1.0    | 2.9 $\pm$ 1.6   | <2.2*10 <sup>-16</sup>        | 2.2 $\pm$ 1.0      | 2.8 $\pm$ 1.5    | <2.2*10 <sup>-16</sup>        | 9.1*10 <sup>-7</sup>                              | 1.6*10 <sup>-12</sup>  |
| Trunk fat mass (kg)                          | 14.0 $\pm$ 5.1   | 13.8 $\pm$ 5.3  | <2.2*10 <sup>-16</sup>        | 13.9 $\pm$ 5.0     | 13.6 $\pm$ 5.2   | <2.2*10 <sup>-16</sup>        | 3.4*10 <sup>-8</sup>                              | 1.9*10 <sup>-9</sup>   |
| <i>Proportional distribution of body fat</i> |                  |                 |                               |                    |                  |                               |                                                   |                        |
| Leg fat ratio – LFR (%)                      | 28.0 $\pm$ 3.4   | 39.7 $\pm$ 4.0  | <2.2*10 <sup>-16</sup>        | 28.1 $\pm$ 3.3     | 39.7 $\pm$ 4.1   | <2.2*10 <sup>-16</sup>        | 0.02                                              | 0.19                   |
| Arm fat ratio – AFR (%)                      | 9.9 $\pm$ 1.3    | 10.1 $\pm$ 1.6  | <2.2*10 <sup>-16</sup>        | 9.9 $\pm$ 1.3      | 10.1 $\pm$ 1.6   | <2.2*10 <sup>-16</sup>        | 0.03                                              | 5.7*10 <sup>-11</sup>  |
| Trunk fat ratio – TFR (%)                    | 62.2 $\pm$ 3.6   | 50.3 $\pm$ 4.1  | <2.2*10 <sup>-16</sup>        | 62.2 $\pm$ 3.6     | 50.3 $\pm$ 4.1   | <2.2*10 <sup>-16</sup>        | 0.22                                              | 0.19                   |

**Supplementary Table 2. SNP-heritability ( $h^2$ ) and LD score regression intercept estimates of body fat ratios.**  $h^2$  and LD score regression intercepts were generated by the LDSC method<sup>1</sup> (see online methods).

|                | <b><math>h^2</math> (95% CI)</b> | <b>GC</b> | <b>LD score regression intercepts (<math>\pm</math> 95% CI)</b> |
|----------------|----------------------------------|-----------|-----------------------------------------------------------------|
| <i>Females</i> |                                  |           |                                                                 |
| AFR females    | 0.25 $\pm$ 0.03                  | 1.246     | 1.02 $\pm$ 0.02                                                 |
| LFR females    | 0.21 $\pm$ 0.03                  | 1.207     | 1.03 $\pm$ 0.02                                                 |
| TFR females    | 0.23 $\pm$ 0.03                  | 1.214     | 1.03 $\pm$ 0.02                                                 |
| <i>Males</i>   |                                  |           |                                                                 |
| AFR males      | 0.15 $\pm$ 0.02                  | 1.146     | 1.01 $\pm$ 0.01                                                 |
| LFR males      | 0.13 $\pm$ 0.02                  | 1.114     | 1.00 $\pm$ 0.01                                                 |
| TFR males      | 0.11 $\pm$ -0.02                 | 1.105     | 1.00 $\pm$ 0.01                                                 |

GC = genomic inflation factor (also denoted as  $\lambda_{GC}$ ).  $h^2$  = heritability. CI = confidence interval.

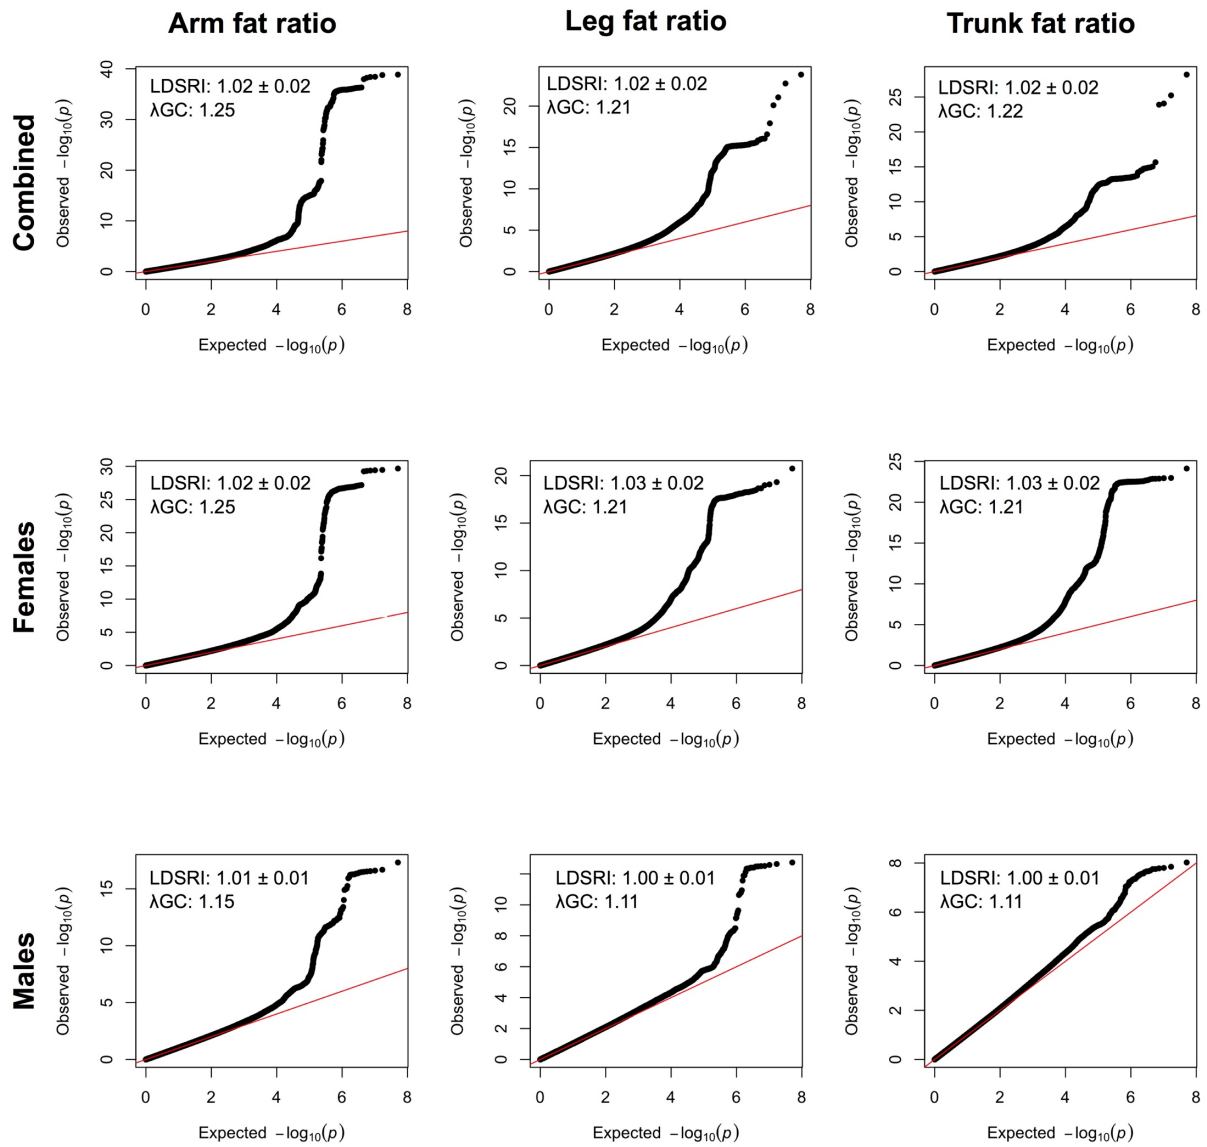

**Supplementary Figure 1. Quantile-quantile plots of the distribution of p-values from GWAS of body fat ratios in the UK Biobank sex-combined, female and male discovery cohorts.** LD-score regression intercepts (LDSRI) and genomic inflation factors were calculated using the LDSC software package. The red line shows the theoretical distribution of P-values under the null-hypothesis, i.e. there are no associations between genetic variants and the studied traits.

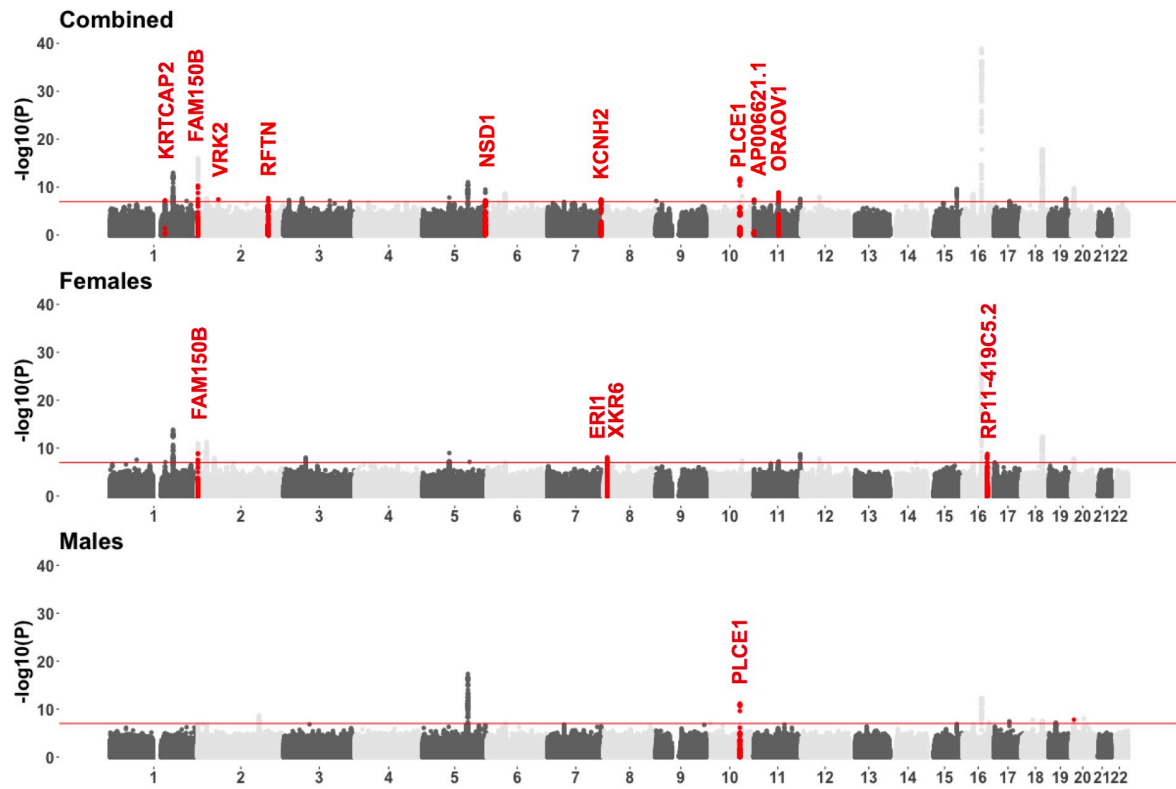

**Supplementary Figure 2. Manhattan plots for GWAS results for arm fat ratio (AFR) in the combined discovery cohort and sex-stratified analyses.** X-axes denote chromosome numbers. Y-axes denote the negative logarithm to base ten of P-values for association. Loci that have not been associated with an anthropometric trait in previous GWAS are highlighted in red.

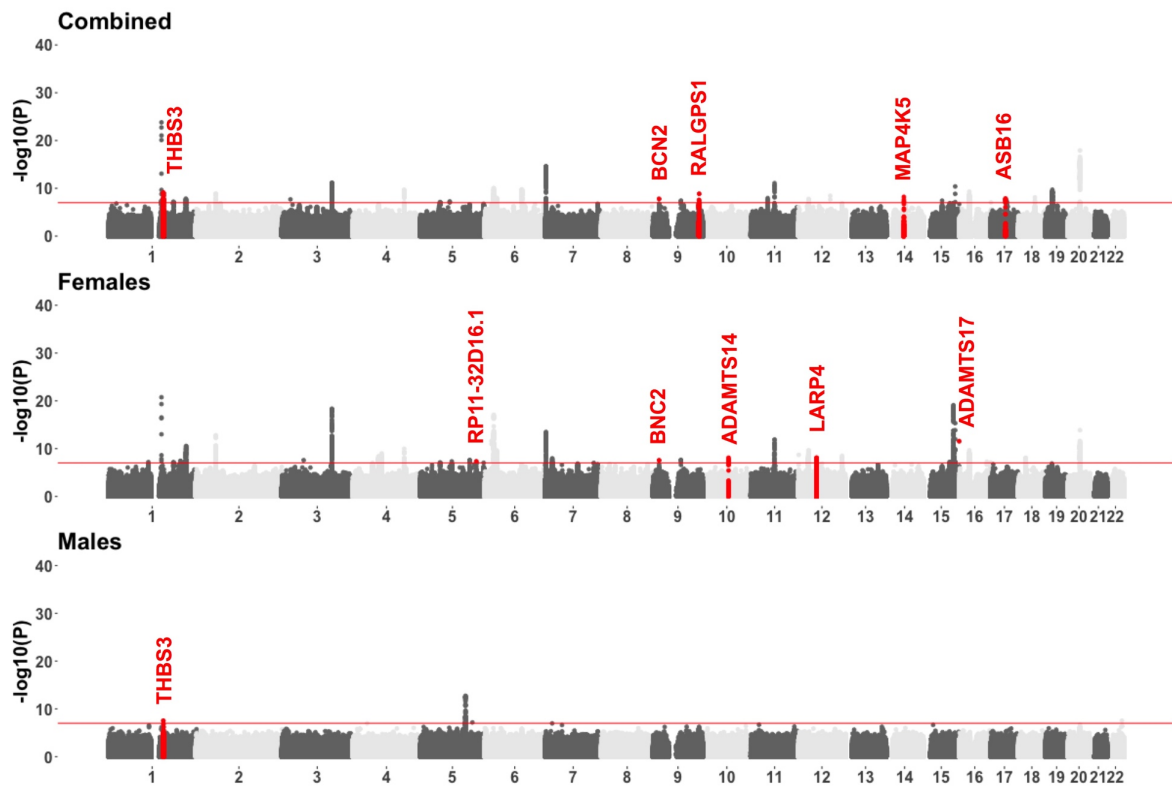

**Supplementary Figure 3. Manhattan plots for GWAS results for leg fat ratio (LFR) in the combined discovery cohort and sex-stratified analyses.** X-axes denote chromosome numbers. Y-axes denote the negative logarithm to base ten of P-values for association. Loci that have not been associated with an anthropometric trait in previous GWAS are highlighted in red.

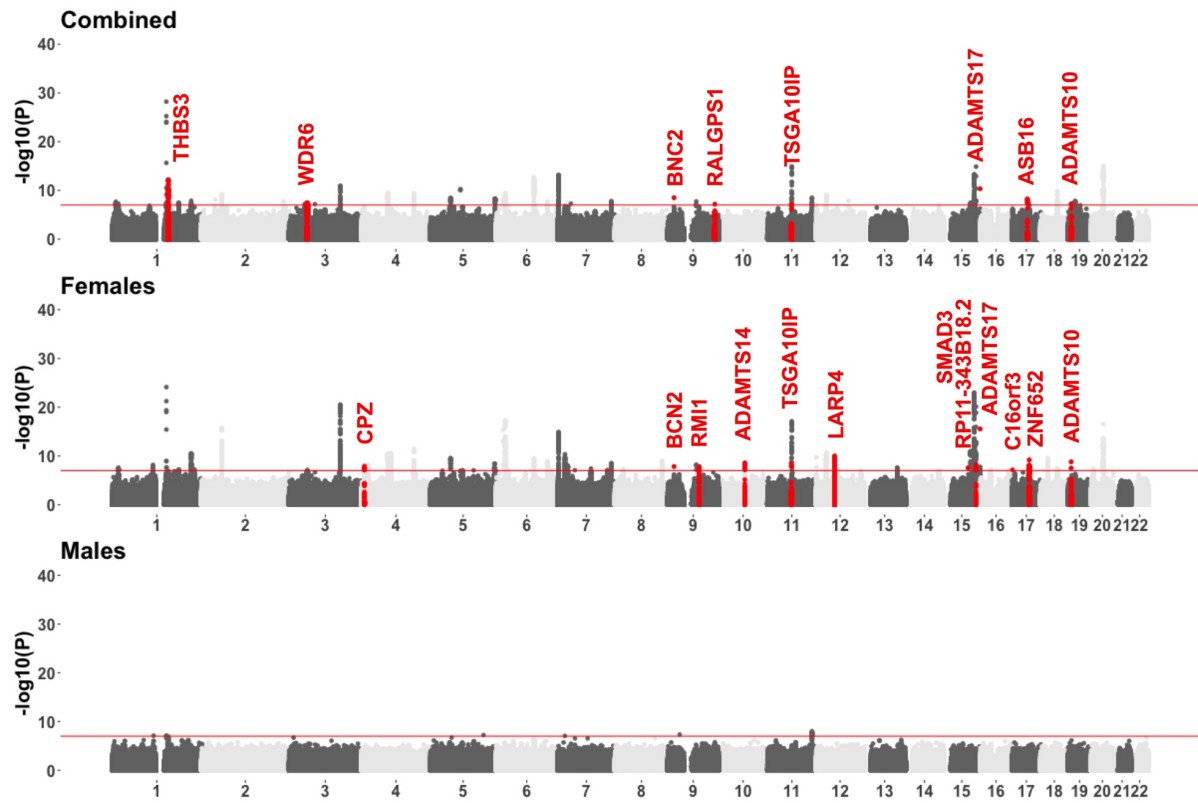

**Supplementary Figure 4. Manhattan plots for GWAS results for trunk fat ratio (TFR) in the combined discovery cohort and sex-stratified analyses.** X-axes denote chromosome numbers. Y-axes denote the negative logarithm to base ten of P-values for association. Loci that have not been associated with an anthropometric trait in previous GWAS are highlighted in red.



**Supplementary Table 3.** Independent signals\* for association with body fat ratios in the combined cohort.

| CHR | RSID        | BP          | Locus name                 | Discovery     |           |               |           |               |           | Replication   |           |               |           |               |           |
|-----|-------------|-------------|----------------------------|---------------|-----------|---------------|-----------|---------------|-----------|---------------|-----------|---------------|-----------|---------------|-----------|
|     |             |             |                            | $\beta_{AFR}$ | $P_{AFR}$ | $\beta_{LFR}$ | $P_{LFR}$ | $\beta_{TFR}$ | $P_{TFR}$ | $\beta_{AFR}$ | $P_{AFR}$ | $\beta_{LFR}$ | $P_{LFR}$ | $\beta_{TFR}$ | $P_{TFR}$ |
| 1   | rs4846204   | 10,308,958  | <i>KIF1B (b)</i>           | -0.008        | 1.94E-01  | -0.032        | 5.41E-07  | 0.035         | 2.87E-08  | -0.011        | 9.60E-03  | -0.021        | 7.61E-07  | 0.026         | 2.25E-09  |
| 1   | rs55750792  | 17,306,870  | <i>MFAP2 (a)</i>           | 0.007         | 7.89E-02  | 0.020         | 1.90E-06  | -0.023        | 6.94E-08  | 0.011         | 7.03E-05  | 0.013         | 1.15E-05  | -0.018        | 6.19E-10  |
| 1   | rs2273368   | 113,063,771 | <i>WNT2B (a)</i>           | 0.009         | 9.81E-02  | 0.020         | 2.55E-04  | -0.023        | 2.45E-05  | 0.006         | 8.89E-02  | 0.013         | 4.86E-04  | -0.015        | 5.34E-05  |
| 1   | rs11205303  | 149,906,413 | <i>SF3B4 (a)</i>           | -0.015        | 6.46E-04  | -0.044        | 3.70E-24  | 0.048         | 1.74E-28  | -0.005        | 9.80E-02  | -0.052        | 3.24E-70  | 0.053         | 1.16E-72  |
| 1   | rs4971091   | 155,143,768 | <i>KRTCAP2 (b)</i>         | -0.024        | 8.23E-08  | 0.006         | 2.05E-01  | 0.004         | 3.69E-01  | -0.013        | 1.35E-05  | 0.005         | 8.48E-02  | -0.001        | 8.58E-01  |
| 1   | rs180921974 | 155,268,131 | <i>THBS3(d)</i>            | 0.043         | 2.55E-03  | 0.087         | 1.18E-09  | -0.102        | 1.05E-12  | 0.023         | 1.84E-02  | 0.090         | 1.47E-20  | -0.097        | 9.45E-24  |
| 1   | rs545608    | 177,899,121 | <i>SEC16B (a)</i>          | 0.038         | 1.62E-13  | -0.021        | 3.87E-05  | 0.007         | 2.06E-01  | 0.039         | 8.79E-28  | -0.014        | 8.62E-05  | -0.001        | 8.66E-01  |
| 1   | rs5779197   | 184,009,826 | <i>TSEN15, GLT25D2 (a)</i> | -0.004        | 4.31E-01  | -0.024        | 8.60E-08  | 0.024         | 6.75E-08  | -0.014        | 3.14E-06  | -0.016        | 1.30E-07  | 0.019         | 1.52E-10  |
| 1   | rs991967    | 218,615,451 | <i>TGFB2 (a)</i>           | -0.001        | 8.15E-01  | -0.026        | 2.92E-08  | 0.026         | 4.76E-08  | 0.000         | 9.70E-01  | -0.013        | 5.31E-05  | 0.012         | 8.43E-05  |
| 1   | rs2820443   | 219,753,509 | <i>LYPLAL1 (a)</i>         | 0.004         | 3.59E-01  | -0.025        | 6.01E-08  | 0.022         | 3.16E-06  | 0.000         | 9.51E-01  | -0.027        | 1.77E-17  | 0.025         | 4.20E-15  |
| 1   | rs10916174  | 227,804,041 | <i>ZNF678 (a)</i>          | 0.027         | 3.88E-06  | 0.012         | 3.93E-02  | -0.022        | 1.49E-04  | 0.013         | 7.16E-04  | 0.013         | 1.04E-03  | -0.017        | 1.90E-05  |
| 2   | rs62107261  | 422,144     | <i>FAM150B (a)</i>         | -0.063        | 3.08E-10  | 0.019         | 0.05793   | 0.005         | 0.5976    | -0.077        | 3.67E-30  | 0.033         | 8.53E-07  | -0.0001       | 0.9784    |
| 2   | rs6731872   | 624,205     | <i>TMEM18 (a)</i>          | -0.047        | 1.87E-16  | 0.006         | 3.16E-01  | 0.014         | 1.10E-02  | -0.042        | 9.07E-29  | 0.006         | 1.12E-01  | 0.011         | 3.88E-03  |
| 2   | rs754537    | 25,176,277  | <i>RBJ, DNAJC27 (a)</i>    | -0.021        | 7.03E-07  | 0.003         | 4.84E-01  | 0.006         | 1.78E-01  | -0.024        | 1.00E-16  | -0.003        | 2.96E-01  | 0.013         | 6.40E-06  |
| 2   | rs17511102  | 37,960,613  | <i>CDC42EP3 (a)</i>        | -0.021        | 4.90E-03  | -0.034        | 4.21E-06  | 0.042         | 1.10E-08  | -0.006        | 2.45E-01  | -0.019        | 1.86E-04  | 0.020         | 8.40E-05  |
| 2   | rs7562173   | 46,976,217  | <i>SOCS5 (a)</i>           | -0.014        | 1.07E-03  | -0.002        | 6.00E-01  | 0.010         | 2.92E-02  | -0.009        | 3.66E-03  | -0.007        | 2.43E-02  | 0.010         | 8.01E-04  |
| 2   | rs3791679   | 56,096,892  | <i>EFEMP1 (a)</i>          | 0.006         | 2.51E-01  | 0.030         | 1.86E-09  | -0.031        | 8.73E-10  | 0.008         | 1.43E-02  | 0.036         | 3.25E-26  | -0.039        | 1.24E-30  |
| 2   | rs13011472  | 57,961,602  | <i>VRK2 (b)</i>            | -0.024        | 4.81E-08  | 0.007         | 1.30E-01  | 0.003         | 5.60E-01  | -0.013        | 6.96E-06  | 0.001         | 8.04E-01  | 0.005         | 7.84E-02  |
| 2   | rs148812496 | 198,540,352 | <i>RFTN (b)</i>            | -0.030        | 2.41E-08  | -0.009        | 1.02E-01  | 0.019         | 3.67E-04  | -0.015        | 4.19E-05  | -0.012        | 9.29E-04  | 0.017         | 2.21E-06  |
| 3   | rs4521268   | 49,137,904  | <i>WDR6(c)</i>             | 0.007         | 1.44E-01  | 0.023         | 3.93E-07  | -0.025        | 4.30E-08  | 0.006         | 6.27E-02  | 0.018         | 4.04E-09  | -0.021        | 5.00E-12  |
| 3   | rs1986599   | 50,034,637  | <i>RBM6 (b)</i>            | 0.020         | 2.98E-03  | 0.028         | 2.95E-05  | -0.037        | 4.28E-08  | 0.023         | 1.32E-07  | 0.012         | 8.65E-03  | -0.021        | 1.47E-06  |
| 3   | rs13069365  | 51,016,959  | <i>DOCK3 (a)</i>           | -0.035        | 3.09E-08  | -0.011        | 7.20E-02  | 0.024         | 1.64E-04  | -0.018        | 1.80E-05  | -0.013        | 3.59E-03  | 0.019         | 9.94E-06  |
| 3   | rs565817433 | 52,718,183  | <i>NEK4(c)</i>             | 0.013         | 2.29E-03  | 0.017         | 4.57E-05  | -0.023        | 6.83E-08  | 0.007         | 2.19E-02  | 0.011         | 2.39E-04  | -0.013        | 5.92E-06  |
| 3   | rs9853018   | 141,101,961 | <i>ZBTB38 (a)</i>          | 0.002         | 5.77E-01  | -0.029        | 1.42E-11  | 0.028         | 3.23E-11  | -0.005        | 8.23E-02  | -0.025        | 1.45E-18  | 0.027         | 9.63E-21  |
| 4   | rs2241069   | 8,602,798   | <i>CPZ (b)</i>             | -0.010        | 1.71E-02  | -0.016        | 2.37E-04  | 0.021         | 1.41E-06  | -0.010        | 7.70E-04  | -0.011        | 9.97E-05  | 0.015         | 3.85E-07  |

|   |             |             |                                |        |          |        |          |        |          |        |          |        |          |        |          |
|---|-------------|-------------|--------------------------------|--------|----------|--------|----------|--------|----------|--------|----------|--------|----------|--------|----------|
| 4 | rs79334166  | 17,859,466  | <i>FAM184B, C4orf30</i><br>(a) | 0.005  | 4.32E-01 | 0.023  | 2.51E-04 | -0.025 | 8.54E-05 | 0.005  | 2.17E-01 | 0.017  | 5.53E-05 | -0.019 | 9.83E-06 |
| 4 | rs4694504   | 73,496,691  | <i>ADAMTS3</i> (a, c)          | -0.015 | 4.13E-04 | -0.018 | 1.94E-05 | 0.022  | 2.99E-07 | -0.008 | 4.02E-03 | -0.025 | 4.29E-18 | 0.028  | 5.98E-23 |
| 4 | rs994014    | 82,165,790  | <i>PRKG2</i> (a)               | -0.009 | 4.43E-02 | -0.018 | 5.56E-05 | 0.021  | 6.71E-06 | -0.012 | 8.92E-05 | -0.019 | 9.33E-10 | 0.023  | 3.02E-13 |
| 4 | rs7680661   | 145,565,116 | <i>HHIP</i> (a)                | 0.007  | 1.92E-01 | 0.033  | 7.68E-09 | -0.035 | 5.92E-10 | 0.013  | 6.89E-04 | 0.036  | 3.19E-21 | -0.041 | 1.16E-26 |
| 5 | rs465983    | 55,812,130  | <i>MAP3K1</i> (a)              | -0.007 | 1.71E-01 | -0.026 | 1.48E-07 | 0.029  | 6.75E-09 | -0.007 | 2.70E-02 | -0.021 | 2.04E-10 | 0.024  | 2.65E-12 |
| 5 | rs34341     | 74,934,009  | <i>ANKDD1B</i> (c)             | -0.024 | 1.99E-08 | 0.006  | 1.58E-01 | 0.003  | 5.55E-01 | -0.016 | 3.80E-08 | 0.005  | 9.67E-02 | 0.002  | 4.89E-01 |
| 5 | rs115912456 | 82,815,158  | <i>VCAN</i> (a)                | 0.038  | 4.15E-04 | 0.057  | 7.21E-08 | -0.069 | 7.84E-11 | 0.018  | 1.26E-02 | 0.046  | 2.43E-10 | -0.052 | 8.78E-13 |
| 5 | rs3812049   | 127,418,850 | <i>SLC12A2</i> (b)             | 0.033  | 1.39E-11 | -0.023 | 4.15E-06 | 0.010  | 3.72E-02 | 0.037  | 1.42E-28 | -0.022 | 3.54E-11 | 0.008  | 1.09E-02 |
| 5 | rs1317415   | 157,952,404 | <i>RP11-32D16.1</i> (b)        | 0.002  | 6.30E-01 | -0.017 | 2.13E-04 | 0.016  | 4.03E-04 | 0.005  | 1.23E-01 | -0.015 | 2.75E-06 | 0.012  | 8.24E-05 |
| 5 | rs351855    | 176,520,243 | <i>FGFR4</i> (a)               | 0.029  | 4.51E-10 | 0.002  | 6.09E-01 | -0.012 | 9.71E-03 | 0.016  | 3.05E-07 | 0.006  | 7.51E-02 | -0.012 | 1.86E-04 |
| 5 | rs34022431  | 176,677,563 | <i>NSD1</i> (b)                | 0.071  | 8.55E-08 | 0.021  | 1.13E-01 | -0.048 | 3.46E-04 | 0.040  | 7.12E-06 | 0.029  | 1.51E-03 | -0.042 | 3.02E-06 |
| 5 | rs888762    | 178,547,313 | <i>ADAMTS2</i> (b)             | -0.009 | 4.98E-02 | -0.023 | 3.63E-07 | 0.026  | 6.32E-09 | -0.004 | 2.26E-01 | -0.018 | 8.90E-09 | 0.020  | 1.34E-10 |
| 6 | rs41271299  | 19,839,415  | <i>ID4</i> (a)                 | -0.017 | 7.16E-02 | -0.047 | 7.82E-07 | 0.055  | 9.83E-09 | -0.020 | 1.87E-03 | -0.041 | 3.58E-10 | 0.047  | 5.26E-13 |
| 6 | rs9358913   | 26,239,404  | <i>HIST1H2BE</i> (a)           | 0.002  | 6.90E-01 | 0.028  | 6.14E-09 | -0.028 | 8.44E-09 | 0.012  | 4.39E-04 | 0.029  | 2.72E-19 | -0.031 | 6.60E-22 |
| 6 | rs9469762   | 34,236,430  | <i>HMGAI</i> (a)               | 0.016  | 2.39E-01 | -0.053 | 8.75E-05 | 0.047  | 5.07E-04 | 0.016  | 6.26E-02 | -0.022 | 1.34E-02 | 0.017  | 5.52E-02 |
| 6 | rs2492863   | 34,603,646  | <i>C6orf106</i> (b)            | 0.012  | 5.38E-02 | -0.035 | 1.58E-08 | 0.029  | 2.52E-06 | 0.018  | 8.46E-06 | -0.025 | 2.62E-09 | 0.017  | 3.58E-05 |
| 6 | rs2635727   | 50,820,940  | <i>TFAP2</i> (a)               | -0.029 | 2.98E-09 | 0.007  | 1.39E-01 | 0.004  | 4.34E-01 | -0.020 | 2.48E-09 | 0.012  | 2.09E-04 | -0.004 | 2.44E-01 |
| 6 | rs314263    | 105,392,745 | <i>LIN28B</i> (a)              | -0.012 | 6.92E-03 | -0.029 | 2.46E-10 | 0.033  | 3.99E-13 | -0.014 | 1.08E-05 | -0.033 | 7.15E-27 | 0.036  | 1.87E-32 |
| 6 | rs6570507   | 142,679,572 | <i>GPR126</i> (a)              | 0.012  | 1.06E-02 | 0.021  | 7.82E-06 | -0.025 | 7.66E-08 | 0.009  | 4.95E-03 | 0.029  | 6.36E-20 | -0.033 | 1.20E-25 |
| 6 | rs2982708   | 152,356,220 | <i>ESRI</i> (a)                | -0.015 | 2.25E-03 | -0.010 | 3.05E-02 | 0.016  | 8.44E-04 | -0.003 | 2.77E-01 | -0.016 | 3.29E-07 | 0.017  | 6.45E-08 |
| 7 | rs798491    | 2,800,521   | <i>AMZI</i> (a)                | -0.001 | 7.82E-01 | 0.036  | 5.20E-15 | -0.034 | 1.16E-13 | 0.000  | 9.62E-01 | 0.034  | 7.71E-27 | -0.033 | 1.11E-26 |
| 7 | rs3823974   | 20,442,796  | <i>ITGB8</i> (b)               | 0.007  | 1.22E-01 | 0.019  | 1.86E-05 | -0.021 | 1.38E-06 | 0.009  | 2.79E-03 | 0.015  | 2.88E-07 | -0.018 | 1.85E-09 |
| 7 | rs481806    | 28,207,300  | <i>JAZF1</i> (a)               | -0.019 | 2.86E-05 | -0.016 | 3.82E-04 | 0.024  | 2.90E-07 | -0.016 | 5.70E-07 | -0.020 | 1.04E-10 | 0.026  | 1.13E-16 |
| 7 | rs527582137 | 92,251,321  | <i>CDK6</i> (a)                | 0.000  | 9.66E-01 | -0.013 | 6.63E-03 | 0.013  | 6.61E-03 | 0.001  | 8.41E-01 | -0.021 | 1.76E-10 | 0.021  | 4.75E-10 |
| 7 | rs112416074 | 148,647,760 | <i>PDIA4</i> (a)               | -0.007 | 2.05E-01 | -0.029 | 2.85E-07 | 0.032  | 2.07E-08 | -0.008 | 4.42E-02 | -0.016 | 1.82E-05 | 0.019  | 9.60E-07 |
| 7 | rs56282717  | 150,657,095 | <i>KCNH2</i> (b)               | -0.027 | 5.00E-08 | 0.000  | 9.52E-01 | 0.010  | 4.81E-02 | -0.020 | 5.59E-09 | 0.002  | 5.27E-01 | 0.006  | 9.83E-02 |
| 8 | rs2044387   | 8,907,950   | <i>ER11</i> (b)                | 0.018  | 4.00E-05 | 0.002  | 5.90E-01 | -0.010 | 3.08E-02 | 0.017  | 3.06E-09 | 0.002  | 5.62E-01 | -0.008 | 5.30E-03 |
| 8 | rs12546366  | 10,802,146  | <i>XKR6</i> (b)                | 0.020  | 4.85E-06 | 0.004  | 3.13E-01 | -0.011 | 8.68E-03 | 0.020  | 1.30E-11 | 0.007  | 2.33E-02 | -0.013 | 3.25E-06 |

|    |             |             |                           |        |          |        |          |        |          |        |          |        |          |        |          |
|----|-------------|-------------|---------------------------|--------|----------|--------|----------|--------|----------|--------|----------|--------|----------|--------|----------|
| 8  | rs4733727   | 130,731,484 | <i>MLZE, GSDMC (a)</i>    | 0.007  | 9.35E-02 | 0.018  | 4.07E-05 | -0.020 | 2.81E-06 | 0.002  | 4.07E-01 | 0.011  | 8.31E-05 | -0.012 | 2.27E-05 |
| 9  | rs10962638  | 16,846,111  | <i>BNC2 (b)</i>           | 0.005  | 4.50E-01 | 0.035  | 2.17E-08 | -0.037 | 4.22E-09 | 0.000  | 9.97E-01 | 0.015  | 1.63E-04 | -0.014 | 3.90E-04 |
| 9  | rs35344761  | 78,510,823  | <i>PCSK5 (a)</i>          | 0.003  | 6.46E-01 | 0.036  | 5.12E-08 | -0.035 | 9.04E-08 | 0.014  | 1.57E-03 | 0.034  | 5.63E-14 | -0.038 | 1.36E-17 |
| 9  | rs7039458   | 86,639,999  | <i>RMII (c,d)</i>         | 0.001  | 8.97E-01 | -0.024 | 6.78E-07 | 0.025  | 5.61E-07 | -0.003 | 3.27E-01 | -0.024 | 1.57E-12 | 0.024  | 1.79E-13 |
| 9  | rs3780327   | 129,945,847 | <i>RALGPS1 (b)</i>        | 0.008  | 1.36E-01 | -0.031 | 1.95E-09 | 0.028  | 8.70E-08 | 0.010  | 5.98E-03 | -0.016 | 2.50E-06 | 0.013  | 2.06E-04 |
| 10 | rs34821335  | 72,433,203  | <i>ADAMTS14(c)</i>        | -0.010 | 3.91E-02 | -0.017 | 5.50E-04 | 0.020  | 2.48E-05 | -0.008 | 1.42E-02 | -0.014 | 1.20E-05 | 0.016  | 7.67E-07 |
| 10 | rs11289753  | 96,026,184  | <i>PLCE1 (b)</i>          | 0.030  | 2.41E-12 | 0.007  | 1.24E-01 | -0.017 | 6.15E-05 | 0.021  | 1.60E-12 | 0.007  | 2.21E-02 | -0.013 | 4.68E-06 |
| 11 | rs1138714   | 825,110     | <i>AP006621.1 (b)</i>     | -0.024 | 5.47E-08 | 0.002  | 5.93E-01 | 0.007  | 1.21E-01 | -0.012 | 2.50E-05 | 0.002  | 6.05E-01 | 0.004  | 1.88E-01 |
| 11 | rs10769282  | 47,626,492  | <i>MTCH2 (a)</i>          | -0.022 | 1.50E-06 | 0.026  | 1.49E-08 | -0.017 | 2.20E-04 | -0.018 | 4.99E-09 | 0.021  | 8.93E-12 | -0.014 | 6.53E-06 |
| 11 | rs71455793  | 65,715,204  | <i>TSGA10IP(d)</i>        | 0.033  | 1.21E-03 | 0.047  | 3.28E-06 | -0.054 | 9.09E-08 | 0.017  | 1.12E-02 | 0.015  | 2.63E-02 | -0.019 | 5.96E-03 |
| 11 | rs552846225 | 66,913,469  | <i>KDM2A (a)</i>          | 0.026  | 3.82E-04 | 0.049  | 1.26E-11 | -0.057 | 3.32E-15 | 0.014  | 6.06E-03 | 0.034  | 3.33E-12 | -0.039 | 3.94E-15 |
| 11 | rs4980661   | 69,306,579  | <i>MYEOV, CCND1 (a)</i>   | 0.024  | 9.49E-09 | -0.008 | 5.64E-02 | -0.002 | 5.72E-01 | 0.013  | 9.61E-06 | 0.003  | 3.80E-01 | -0.007 | 1.33E-02 |
| 11 | rs1789166   | 69,482,091  | <i>ORA0VI (b)</i>         | -0.027 | 1.85E-09 | 0.010  | 1.89E-02 | 0.000  | 9.13E-01 | -0.013 | 2.05E-05 | 0.002  | 4.08E-01 | 0.002  | 5.21E-01 |
| 12 | rs34716573  | 576,037     | <i>B4GALNT3 (a)</i>       | -0.003 | 4.79E-01 | -0.022 | 1.02E-06 | 0.024  | 1.22E-07 | -0.001 | 6.53E-01 | -0.009 | 2.16E-03 | 0.009  | 3.97E-03 |
| 12 | rs11049566  | 28,532,961  | <i>CCDC91 (a)</i>         | 0.012  | 1.09E-02 | 0.026  | 2.46E-08 | -0.028 | 1.36E-09 | 0.015  | 3.84E-06 | 0.013  | 2.84E-05 | -0.018 | 6.50E-09 |
| 12 | rs7306275   | 50,250,111  | <i>BCDIN3D, FAIM2 (a)</i> | 0.025  | 1.36E-08 | -0.018 | 4.73E-05 | 0.008  | 7.74E-02 | 0.016  | 4.15E-08 | -0.010 | 8.11E-04 | 0.003  | 3.55E-01 |
| 12 | rs11614785  | 50,880,422  | <i>LARP4 (b)</i>          | -0.014 | 1.36E-03 | -0.014 | 1.40E-03 | 0.019  | 1.77E-05 | -0.012 | 8.80E-05 | -0.009 | 3.43E-03 | 0.013  | 1.76E-05 |
| 12 | rs6489111   | 123,051,018 | <i>KNTC1 (a)</i>          | 0.007  | 1.49E-01 | -0.023 | 7.51E-07 | 0.019  | 3.71E-05 | 0.010  | 6.24E-04 | -0.011 | 3.89E-04 | 0.006  | 3.96E-02 |
| 13 | rs6492538   | 91,993,746  | <i>GPC5 (b)</i>           | -0.005 | 2.99E-01 | -0.020 | 1.38E-04 | 0.020  | 9.86E-05 | -0.004 | 2.11E-01 | -0.009 | 1.07E-02 | 0.010  | 3.79E-03 |
| 14 | rs71420186  | 50,960,918  | <i>MAP4K5 (b)</i>         | 0.029  | 7.94E-04 | -0.050 | 8.25E-09 | 0.036  | 2.55E-05 | 0.011  | 5.94E-02 | -0.038 | 3.20E-11 | 0.033  | 1.17E-08 |
| 15 | rs35874463  | 67,457,698  | <i>SMAD3(d)</i>           | -0.020 | 2.30E-02 | -0.030 | 8.59E-04 | 0.039  | 1.86E-05 | -0.009 | 1.31E-01 | -0.046 | 4.96E-14 | 0.047  | 1.61E-14 |
| 15 | rs12905253  | 74,232,437  | <i>PML (a)</i>            | 0.016  | 1.75E-04 | 0.018  | 1.34E-05 | -0.023 | 4.43E-08 | 0.012  | 5.03E-05 | 0.018  | 1.60E-10 | -0.022 | 6.32E-15 |
| 15 | rs11856122  | 84,576,348  | <i>ADAMTSL3 (a)</i>       | 0.026  | 6.59E-10 | 0.021  | 5.01E-07 | -0.031 | 3.68E-13 | 0.028  | 4.40E-23 | 0.025  | 1.65E-18 | -0.034 | 1.07E-32 |
| 15 | rs11856122  | 89,361,669  | <i>RP11-343B18.2(c)</i>   | -0.007 | 1.07E-01 | -0.019 | 7.64E-06 | 0.020  | 1.39E-06 | -0.006 | 5.31E-02 | -0.014 | 2.53E-06 | 0.015  | 1.00E-07 |
| 15 | rs28584580  | 89,397,827  | <i>ACAN (a)</i>           | 0.040  | 1.43E-03 | 0.029  | 2.12E-02 | -0.043 | 6.58E-04 | 0.043  | 3.15E-07 | 0.044  | 1.97E-07 | -0.058 | 7.09E-12 |
| 15 | rs3817428   | 89,415,247  | <i>ACAN (a)</i>           | 0.021  | 1.53E-05 | 0.031  | 6.01E-11 | -0.038 | 2.30E-15 | 0.024  | 2.32E-13 | 0.026  | 4.34E-16 | -0.034 | 4.59E-25 |
| 15 | rs72755233  | 100,692,953 | <i>ADAMTSL7(d)</i>        | 0.030  | 6.56E-06 | 0.034  | 2.53E-07 | -0.044 | 6.43E-11 | 0.033  | 1.42E-13 | 0.042  | 3.25E-20 | -0.053 | 1.54E-31 |

|    |             |             |                                     |        |          |         |          |        |          |        |          |        |          |        |          |
|----|-------------|-------------|-------------------------------------|--------|----------|---------|----------|--------|----------|--------|----------|--------|----------|--------|----------|
| 15 | rs4988781   | 100,800,840 | <i>ADAMTS17 (a)</i>                 | -0.008 | 8.21E-02 | -0.015  | 1.17E-03 | 0.018  | 5.28E-05 | -0.006 | 3.58E-02 | -0.019 | 1.07E-09 | 0.021  | 6.50E-12 |
| 16 | rs369515117 | 28,862,780  | <i>SH2B1 (a)</i>                    | 0.014  | 1.81E-03 | -0.027  | 1.99E-09 | 0.021  | 2.47E-06 | 0.019  | 1.82E-10 | -0.025 | 1.92E-16 | 0.016  | 1.23E-07 |
| 16 | rs8050894   | 31,104,509  | <i>KAT8(c)</i>                      | -0.024 | 7.02E-08 | 0.002   | 6.14E-01 | 0.005  | 2.18E-01 | -0.017 | 4.76E-09 | 0.010  | 1.00E-03 | -0.003 | 2.86E-01 |
| 16 | rs55872725  | 53,809,123  | <i>FTO(a)</i>                       | 0.056  | 6.11E-39 | -0.006  | 1.85E-01 | -0.018 | 2.28E-05 | 0.050  | 4.99E-66 | -0.009 | 3.22E-03 | -0.013 | 7.17E-06 |
| 16 | rs8057620   | 69,884,619  | <i>RP11-419C5.2(c)</i>              | 0.015  | 4.71E-04 | -0.013  | 3.19E-03 | 0.005  | 2.19E-01 | 0.017  | 1.49E-09 | -0.010 | 4.30E-04 | 0.003  | 3.25E-01 |
| 16 | rs10584116  | 90,062,323  | <i>C16orf3(c)</i>                   | 0.010  | 1.66E-01 | 0.027   | 1.47E-04 | -0.030 | 2.62E-05 | 0.011  | 2.42E-02 | 0.015  | 1.69E-03 | -0.018 | 1.67E-04 |
| 17 | rs2071167   | 42,287,519  | <i>ASB16(c)</i>                     | -0.005 | 2.79E-01 | -0.028  | 1.84E-08 | 0.029  | 7.59E-09 | 0.004  | 1.94E-01 | -0.013 | 1.04E-04 | 0.011  | 9.54E-04 |
| 17 | rs2074188   | 45,888,251  | <i>SP6, SP2 (a)</i>                 | -0.001 | 7.67E-01 | -0.023  | 9.65E-08 | 0.023  | 4.73E-08 | -0.006 | 2.69E-02 | -0.009 | 2.85E-03 | 0.011  | 1.83E-04 |
| 17 | rs28394864  | 47,450,775  | <i>ZNF652 (b)</i>                   | 0.011  | 1.31E-02 | 0.018   | 1.98E-05 | -0.022 | 1.42E-07 | 0.016  | 7.48E-08 | 0.014  | 1.91E-06 | -0.018 | 3.25E-10 |
| 18 | rs4800148   | 20,724,328  | <i>RBBP8, CABLES1, C18orf45 (a)</i> | 0.007  | 1.51E-01 | 0.016   | 1.80E-03 | -0.018 | 5.30E-04 | 0.011  | 2.14E-03 | 0.015  | 1.70E-05 | -0.019 | 8.98E-08 |
| 18 | rs7236575   | 46,653,380  | <i>DYM (a)</i>                      | 0.011  | 7.46E-02 | 0.035   | 1.07E-08 | -0.039 | 2.14E-10 | 0.007  | 1.05E-01 | 0.011  | 6.36E-03 | -0.014 | 7.66E-04 |
| 18 | rs71336392  | 57,850,927  | <i>MC4R (a)</i>                     | 0.044  | 2.46E-18 | -0.011  | 2.70E-02 | -0.008 | 1.23E-01 | 0.048  | 3.63E-46 | -0.012 | 2.40E-04 | -0.006 | 6.88E-02 |
| 19 | rs62621197  | 8,670,147   | <i>ADAMTS10(d)</i>                  | 0.032  | 1.14E-02 | 0.059   | 4.78E-06 | -0.069 | 7.38E-08 | 0.036  | 1.35E-05 | 0.085  | 8.32E-25 | -0.097 | 2.43E-31 |
| 19 | rs10402308  | 19,657,500  | <i>GATAD2A (a)</i>                  | -0.008 | 1.73E-01 | 0.035   | 2.82E-10 | -0.031 | 2.03E-08 | 0.000  | 9.62E-01 | 0.014  | 1.33E-04 | -0.015 | 8.56E-05 |
| 19 | rs12971970  | 47,559,273  | <i>ZC3H4 (a)</i>                    | -0.028 | 3.29E-08 | 0.004   | 4.32E-01 | 0.006  | 2.03E-01 | -0.018 | 4.81E-08 | 0.001  | 7.97E-01 | 0.006  | 8.69E-02 |
| 20 | rs6085551   | 6,408,920   | <i>RP11-199O14.1 (b)</i>            | 0.020  | 2.10E-06 | 0.005   | 2.81E-01 | -0.010 | 1.53E-02 | 0.015  | 2.95E-07 | 0.007  | 1.01E-02 | -0.012 | 5.96E-05 |
| 20 | rs2145270   | 6,621,685   | <i>BMP2 (a)</i>                     | -0.028 | 2.53E-10 | -0.005  | 2.48E-01 | 0.014  | 8.84E-04 | -0.021 | 2.69E-12 | -0.007 | 2.37E-02 | 0.014  | 2.31E-06 |
| 20 | rs143384    | 34,025,756  | <i>GDF5 (a)</i>                     | 0.010  | 2.34E-02 | -0.0376 | 2.38E-18 | 0.034  | 1.62E-15 | 0.005  | 1.19E-01 | -0.031 | 7.44E-27 | 0.030  | 3.38E-24 |

\* - The 'clump' function in PLINK was used to identify signals for association that were independent in each GWAS (see methods). Several of the regions were associated with more than one of the three body fat ratios or associated with one body fat ratio in more than one of the strata (males, females or sex-combined). As a result, different leading SNPs were observed for different traits and strata at several loci. To assess whether these represented the same signal, we assessed the LD between the leading SNPs for different traits. SNPs in low LD with the most strongly associated SNP at each locus ( $R^2$ -value < 0.05) were considered to represent independent signals. The 'Locus' column denotes: (a) the reported gene from previous GWAS, (b) the most proximal gene, (c) the most strongly associated gene that is regulated by an eQTL in LD with the leading SNP, or (d) a gene containing a missense variant in LD with the leading SNP. Direction - summary of effect direction for the discovery and replication cohorts, with one '+' or '-' per cohort. All gene names are in italic font. Further data as well as annotations are available in Supplementary Data 1.

**Supplementary Table 4.** Independent signals\* for association with body fat ratios in females.

| CHR | RSID        | BP          | Locus name                     | Discovery     |           |               |           |               |           | Replication   |           |               |           |               |           |
|-----|-------------|-------------|--------------------------------|---------------|-----------|---------------|-----------|---------------|-----------|---------------|-----------|---------------|-----------|---------------|-----------|
|     |             |             |                                | $\beta_{AFR}$ | $P_{AFR}$ | $\beta_{LFR}$ | $P_{LFR}$ | $\beta_{TFR}$ | $P_{TFR}$ | $\beta_{AFR}$ | $P_{AFR}$ | $\beta_{LFR}$ | $P_{LFR}$ | $\beta_{TFR}$ | $P_{TFR}$ |
| 1   | rs4846204   | 10,308,958  | <i>KIF1B (b)</i>               | -0.011        | 2.20E-01  | -0.035        | 6.60E-05  | 0.039         | 6.77E-06  | -0.010        | 1.01E-01  | -0.019        | 9.38E-04  | 0.025         | 2.29E-05  |
| 1   | rs55750792  | 17,306,870  | <i>MFAP2 (a)</i>               | 0.016         | 6.48E-03  | 0.027         | 4.76E-06  | -0.032        | 3.21E-08  | 0.019         | 1.36E-06  | 0.019         | 8.15E-07  | -0.027        | 3.04E-12  |
| 1   | rs2273368   | 113,063,771 | <i>WNT2B (a)</i>               | 0.009         | 2.49E-01  | 0.040         | 8.70E-08  | -0.043        | 9.44E-09  | 0.010         | 3.80E-02  | 0.030         | 9.29E-10  | -0.033        | 1.09E-11  |
| 1   | rs11205303  | 149,906,413 | <i>SF3B4 (a)</i>               | -0.016        | 7.23E-03  | -0.056        | 3.89E-21  | 0.060         | 1.82E-24  | -0.012        | 2.51E-03  | -0.063        | 1.67E-57  | 0.067         | 5.98E-65  |
| 1   | rs4971091   | 155,143,768 | <i>KRTCAP2 (b)</i>             | -0.030        | 7.74E-07  | 0.003         | 5.93E-01  | 0.009         | 1.21E-01  | -0.013        | 1.27E-03  | 0.007         | 9.42E-02  | -0.001        | 7.78E-01  |
| 1   | rs180921974 | 155,268,131 | <i>THBS3(d)</i>                | 0.050         | 1.06E-02  | 0.082         | 2.65E-05  | -0.101        | 2.73E-07  | 0.027         | 4.08E-02  | 0.095         | 4.45E-13  | -0.103        | 3.82E-15  |
| 1   | rs545608    | 177,899,121 | <i>SEC16B (a)</i>              | 0.054         | 4.02E-14  | -0.029        | 6.82E-05  | 0.008         | 2.54E-01  | 0.048         | 5.37E-24  | -0.027        | 2.10E-08  | 0.008         | 9.20E-02  |
| 1   | rs5779197   | 184,009,826 | <i>TSEN15,<br/>GLT25D2 (a)</i> | -0.004        | 5.19E-01  | -0.032        | 2.91E-07  | 0.032         | 3.34E-07  | -0.018        | 1.41E-05  | -0.031        | 6.80E-14  | 0.035         | 2.32E-17  |
| 1   | rs991967    | 218,615,451 | <i>TGFB2 (a)</i>               | -0.011        | 8.11E-02  | -0.039        | 1.07E-09  | 0.043         | 4.34E-11  | -0.002        | 7.03E-01  | -0.024        | 3.62E-08  | 0.024         | 1.82E-08  |
| 1   | rs2820443   | 219,753,509 | <i>LYPLAL1 (a)</i>             | 0.005         | 4.00E-01  | -0.042        | 5.55E-11  | 0.037         | 6.95E-09  | 0.001         | 8.28E-01  | -0.040        | 6.34E-21  | 0.037         | 5.95E-18  |
| 1   | rs10916174  | 227,804,041 | <i>ZNF678 (a)</i>              | 0.038         | 2.81E-06  | 0.028         | 4.96E-04  | -0.043        | 8.05E-08  | 0.021         | 7.29E-05  | 0.030         | 1.86E-08  | -0.037        | 7.54E-12  |
| 2   | rs62107261  | 422,144     | <i>FAM150B (a)</i>             | -0.080        | 5.17E-09  | 0.032         | 2.05E-02  | -0.002        | 8.82E-01  | -0.094        | 1.92E-25  | 0.047         | 2.08E-07  | -0.006        | 5.35E-01  |
| 2   | rs6731872   | 624,205     | <i>TMEM18 (a)</i>              | -0.052        | 1.92E-11  | 0.021         | 5.97E-03  | 0.003         | 6.66E-01  | -0.051        | 5.88E-23  | 0.018         | 4.19E-04  | 0.004         | 4.20E-01  |
| 2   | rs754537    | 25,176,277  | <i>RBJ,<br/>DNAJC27 (a)</i>    | -0.040        | 9.90E-12  | 0.004         | 4.57E-01  | 0.011         | 5.01E-02  | -0.044        | 2.00E-29  | -0.006        | 1.34E-01  | 0.024         | 1.37E-09  |
| 2   | rs17511102  | 37,960,613  | <i>CDC42EP3<br/>(a)</i>        | -0.037        | 3.03E-04  | -0.030        | 2.92E-03  | 0.044         | 1.30E-05  | -0.018        | 8.82E-03  | -0.023        | 6.31E-04  | 0.028         | 2.92E-05  |
| 2   | rs7562173   | 46,976,217  | <i>SOCS5 (a)</i>               | -0.034        | 1.35E-08  | -0.005        | 3.68E-01  | 0.020         | 1.02E-03  | -0.017        | 1.20E-05  | -0.008        | 4.38E-02  | 0.014         | 3.85E-04  |
| 2   | rs3791679   | 56,096,892  | <i>EFEMP1 (a)</i>              | 0.020         | 3.54E-03  | 0.051         | 3.60E-13  | -0.057        | 3.14E-16  | 0.022         | 2.29E-06  | 0.052         | 5.06E-29  | -0.060        | 2.66E-38  |
| 2   | rs13011472  | 57,961,602  | <i>VRK2 (b)</i>                | -0.025        | 1.85E-05  | 0.003         | 6.60E-01  | 0.007         | 2.06E-01  | -0.014        | 2.49E-04  | 0.000         | 9.48E-01  | 0.006         | 1.18E-01  |
| 2   | rs148812496 | 198,540,352 | <i>RFTN (b)</i>                | -0.031        | 3.63E-05  | 0.000         | 9.89E-01  | 0.011         | 1.52E-01  | -0.017        | 5.18E-04  | -0.012        | 1.10E-02  | 0.018         | 2.58E-04  |
| 3   | rs4521268   | 49,137,904  | <i>WDR6(c)</i>                 | 0.012         | 5.85E-02  | 0.028         | 6.81E-06  | -0.033        | 1.19E-07  | 0.011         | 1.05E-02  | 0.019         | 2.58E-06  | -0.025        | 2.57E-09  |
| 3   | rs1986599   | 50,034,637  | <i>RBM6 (b)</i>                | 0.036         | 1.05E-04  | 0.027         | 3.90E-03  | -0.043        | 5.54E-06  | 0.027         | 6.78E-06  | 0.007         | 2.33E-01  | -0.018        | 2.28E-03  |
| 3   | rs13069365  | 51,016,959  | <i>DOCK3 (a)</i>               | -0.030        | 6.35E-04  | -0.024        | 5.76E-03  | 0.034         | 8.06E-05  | -0.021        | 3.77E-04  | -0.017        | 3.67E-03  | 0.023         | 5.73E-05  |
| 3   | rs565817433 | 52,718,183  | <i>NEK4(c)</i>                 | 0.020         | 5.40E-04  | 0.015         | 9.74E-03  | -0.023        | 1.05E-04  | 0.008         | 4.65E-02  | 0.017         | 1.51E-05  | -0.021        | 1.30E-07  |
| 3   | rs9853018   | 141,101,961 | <i>ZBTB38 (a)</i>              | -0.008        | 1.87E-01  | -0.052        | 9.42E-19  | 0.055         | 1.12E-20  | -0.022        | 1.38E-08  | -0.047        | 1.34E-33  | 0.055         | 4.84E-45  |

|   |             |             |                             |        |          |        |          |        |          |        |          |        |          |        |          |
|---|-------------|-------------|-----------------------------|--------|----------|--------|----------|--------|----------|--------|----------|--------|----------|--------|----------|
| 4 | rs2241069   | 8,602,798   | <i>CPZ (b)</i>              | -0.014 | 1.92E-02 | -0.026 | 6.68E-06 | 0.033  | 1.56E-08 | -0.017 | 1.22E-05 | -0.013 | 1.38E-03 | 0.019  | 7.86E-07 |
| 4 | rs79334166  | 17,859,466  | <i>FAM184B, C4orf30 (a)</i> | 0.029  | 8.05E-04 | 0.040  | 5.23E-06 | -0.050 | 1.04E-08 | 0.035  | 1.78E-09 | 0.015  | 1.13E-02 | -0.027 | 2.96E-06 |
| 4 | rs4694504   | 73,496,691  | <i>ADAMTS3 (a, c)</i>       | -0.018 | 1.66E-03 | -0.029 | 7.98E-07 | 0.033  | 1.62E-08 | -0.012 | 1.59E-03 | -0.032 | 8.82E-17 | 0.038  | 4.69E-22 |
| 4 | rs994014    | 82,165,790  | <i>PRKG2 (a)</i>            | -0.014 | 2.66E-02 | -0.038 | 1.42E-09 | 0.042  | 4.03E-11 | -0.014 | 9.20E-04 | -0.030 | 8.26E-13 | 0.036  | 3.70E-17 |
| 4 | rs7680661   | 145,565,116 | <i>HHIP (a)</i>             | 0.015  | 4.95E-02 | 0.047  | 1.40E-09 | -0.052 | 2.04E-11 | 0.023  | 6.80E-06 | 0.058  | 6.44E-29 | -0.067 | 3.57E-38 |
| 5 | rs465983    | 55,812,130  | <i>MAP3K1 (a)</i>           | -0.020 | 2.84E-03 | -0.036 | 1.82E-07 | 0.043  | 3.88E-10 | -0.013 | 3.95E-03 | -0.025 | 2.71E-08 | 0.029  | 1.92E-10 |
| 5 | rs34341     | 74,934,009  | <i>ANKDD1B(c)</i>           | -0.036 | 1.47E-09 | 0.013  | 3.36E-02 | 0.001  | 8.26E-01 | -0.025 | 1.20E-10 | 0.016  | 5.66E-05 | -0.006 | 1.56E-01 |
| 5 | rs115912456 | 82,815,158  | <i>VCAN (a)</i>             | 0.010  | 5.11E-01 | 0.072  | 9.77E-07 | -0.077 | 1.51E-07 | 0.012  | 2.08E-01 | 0.072  | 1.47E-13 | -0.076 | 9.65E-15 |
| 5 | rs3812049   | 127,418,850 | <i>SLC12A2 (b)</i>          | 0.009  | 1.66E-01 | 0.001  | 8.49E-01 | -0.004 | 5.16E-01 | 0.021  | 1.99E-06 | -0.011 | 1.07E-02 | 0.004  | 4.16E-01 |
| 5 | rs1317415   | 157,952,404 | <i>RP11-32D16.1 (b)</i>     | 0.011  | 8.66E-02 | -0.034 | 6.11E-08 | 0.030  | 1.53E-06 | 0.004  | 3.45E-01 | -0.018 | 1.81E-05 | 0.015  | 3.49E-04 |
| 5 | rs351855    | 176,520,243 | <i>FGFR4 (a)</i>            | 0.024  | 1.58E-04 | 0.015  | 1.67E-02 | -0.023 | 2.57E-04 | 0.012  | 4.43E-03 | 0.012  | 6.50E-03 | -0.017 | 8.57E-05 |
| 5 | rs34022431  | 176,677,563 | <i>NSD1 (b)</i>             | 0.081  | 7.79E-06 | 0.041  | 2.40E-02 | -0.074 | 4.83E-05 | 0.057  | 2.51E-06 | 0.040  | 1.02E-03 | -0.060 | 7.68E-07 |
| 5 | rs888762    | 178,547,313 | <i>ADAMTS2 (b)</i>          | -0.008 | 2.30E-01 | -0.033 | 1.21E-07 | 0.037  | 5.48E-09 | -0.007 | 8.66E-02 | -0.023 | 1.79E-08 | 0.027  | 1.11E-10 |
| 6 | rs41271299  | 19,839,415  | <i>ID4 (a)</i>              | -0.042 | 1.65E-03 | -0.092 | 3.93E-12 | 0.107  | 8.09E-16 | -0.039 | 9.65E-06 | -0.077 | 1.74E-18 | 0.090  | 1.13E-24 |
| 6 | rs9358913   | 26,239,404  | <i>HIST1H2BE (a)</i>        | 0.008  | 2.39E-01 | 0.055  | 7.41E-17 | -0.057 | 1.03E-17 | 0.010  | 2.98E-02 | 0.052  | 2.59E-31 | -0.053 | 1.11E-32 |
| 6 | rs9469762   | 34,236,430  | <i>HMGAI (a)</i>            | 0.014  | 4.51E-01 | -0.101 | 8.01E-08 | 0.096  | 3.86E-07 | 0.011  | 3.37E-01 | -0.059 | 7.42E-07 | 0.054  | 4.68E-06 |
| 6 | rs2492863   | 34,603,646  | <i>C6orf106 (b)</i>         | 0.017  | 4.82E-02 | -0.053 | 3.48E-10 | 0.045  | 1.04E-07 | 0.022  | 7.87E-05 | -0.046 | 5.26E-16 | 0.036  | 1.48E-10 |
| 6 | rs2635727   | 50,820,940  | <i>TFAP2 (a)</i>            | -0.032 | 3.48E-06 | 0.009  | 1.77E-01 | 0.004  | 5.77E-01 | -0.021 | 3.65E-06 | 0.012  | 7.24E-03 | -0.004 | 3.81E-01 |
| 6 | rs314263    | 105,392,745 | <i>LIN28B (a)</i>           | -0.019 | 1.95E-03 | -0.032 | 2.93E-07 | 0.039  | 4.96E-10 | -0.015 | 3.43E-04 | -0.035 | 5.35E-17 | 0.039  | 8.42E-21 |
| 6 | rs6570507   | 142,679,572 | <i>GPR126 (a)</i>           | 0.027  | 3.41E-05 | 0.029  | 9.03E-06 | -0.039 | 1.78E-09 | 0.013  | 2.42E-03 | 0.039  | 1.02E-19 | -0.045 | 1.57E-25 |
| 6 | rs2982708   | 152,356,220 | <i>ESR1 (a)</i>             | -0.023 | 5.23E-04 | -0.028 | 1.85E-05 | 0.035  | 6.83E-08 | -0.008 | 8.21E-02 | -0.023 | 1.89E-07 | 0.025  | 1.35E-08 |
| 7 | rs798491    | 2,800,521   | <i>AMZI (a)</i>             | 0.009  | 1.66E-01 | 0.048  | 7.78E-14 | -0.050 | 2.19E-15 | 0.012  | 6.34E-03 | 0.044  | 6.08E-25 | -0.048 | 1.69E-29 |
| 7 | rs3823974   | 20,442,796  | <i>ITGB8 (b)</i>            | 0.016  | 8.65E-03 | 0.034  | 1.49E-08 | -0.039 | 6.56E-11 | 0.011  | 5.57E-03 | 0.024  | 2.76E-09 | -0.028 | 2.43E-12 |
| 7 | rs481806    | 28,207,300  | <i>JAZF1 (a)</i>            | -0.020 | 1.69E-03 | -0.028 | 9.99E-06 | 0.036  | 1.43E-08 | -0.025 | 2.97E-09 | -0.030 | 4.46E-12 | 0.039  | 2.31E-20 |
| 7 | rs527582137 | 92,251,321  | <i>CDK6 (a)</i>             | -0.008 | 2.53E-01 | -0.034 | 3.69E-07 | 0.037  | 4.98E-08 | -0.007 | 9.83E-02 | -0.030 | 2.67E-11 | 0.032  | 1.02E-12 |
| 7 | rs112416074 | 148,647,760 | <i>PDIA4 (a)</i>            | -0.016 | 3.98E-02 | -0.038 | 1.08E-06 | 0.046  | 3.88E-09 | -0.019 | 3.75E-04 | -0.023 | 7.98E-06 | 0.029  | 2.37E-08 |
| 7 | rs56282717  | 150,657,095 | <i>KCNH2 (b)</i>            | -0.023 | 6.60E-04 | -0.003 | 6.18E-01 | 0.012  | 7.62E-02 | -0.021 | 2.65E-06 | 0.006  | 2.21E-01 | 0.003  | 5.18E-01 |

|    |             |             |                               |        |          |        |          |        |          |        |          |        |          |        |          |
|----|-------------|-------------|-------------------------------|--------|----------|--------|----------|--------|----------|--------|----------|--------|----------|--------|----------|
| 8  | rs2044387   | 8,907,950   | <i>ER11 (b)</i>               | 0.035  | 1.14E-08 | 0.005  | 4.36E-01 | -0.018 | 3.31E-03 | 0.024  | 1.03E-09 | 0.005  | 2.31E-01 | -0.014 | 7.04E-04 |
| 8  | rs12546366  | 10,802,146  | <i>XKR6 (b)</i>               | 0.031  | 9.29E-08 | 0.004  | 4.97E-01 | -0.017 | 4.60E-03 | 0.021  | 6.50E-08 | 0.004  | 2.81E-01 | -0.012 | 1.85E-03 |
| 8  | rs4733727   | 130,731,484 | <i>MLZE,<br/>GSDMC (a)</i>    | 0.019  | 1.05E-03 | 0.029  | 1.04E-06 | -0.035 | 1.66E-09 | 0.010  | 1.13E-02 | 0.015  | 1.03E-04 | -0.020 | 4.82E-07 |
| 9  | rs10962638  | 16,846,111  | <i>BNC2 (b)</i>               | 0.001  | 8.66E-01 | 0.047  | 3.70E-08 | -0.048 | 1.90E-08 | 0.000  | 9.51E-01 | 0.021  | 1.21E-04 | -0.020 | 3.31E-04 |
| 9  | rs35344761  | 78,510,823  | <i>PCSK5 (a)</i>              | 0.008  | 3.79E-01 | 0.050  | 3.07E-08 | -0.052 | 9.95E-09 | 0.021  | 4.43E-04 | 0.056  | 2.05E-20 | -0.062 | 1.62E-24 |
| 9  | rs7039458   | 86,639,999  | <i>RMI1 (c,d)</i>             | -0.016 | 1.95E-02 | -0.032 | 2.04E-06 | 0.038  | 2.07E-08 | -0.008 | 6.43E-02 | -0.025 | 1.75E-08 | 0.028  | 3.32E-10 |
| 9  | rs3780327   | 129,945,847 | <i>RALGPS1 (b)</i>            | 0.012  | 1.01E-01 | -0.028 | 9.94E-05 | 0.024  | 7.88E-04 | 0.013  | 4.59E-03 | -0.012 | 1.23E-02 | 0.007  | 1.34E-01 |
| 10 | rs34821335  | 72,433,203  | <i>ADAMTS14(c)</i>            | -0.002 | 7.37E-01 | -0.038 | 1.08E-08 | 0.039  | 3.40E-09 | -0.004 | 3.41E-01 | -0.023 | 2.87E-07 | 0.023  | 2.22E-07 |
| 10 | rs11289753  | 96,026,184  | <i>PLCE1 (b)</i>              | 0.019  | 1.64E-03 | 0.016  | 6.86E-03 | -0.024 | 4.25E-05 | 0.010  | 1.29E-02 | 0.017  | 1.12E-05 | -0.020 | 6.16E-07 |
| 11 | rs1138714   | 825,110     | <i>AP006621.1<br/>(b)</i>     | -0.025 | 5.00E-05 | 0.001  | 8.24E-01 | 0.010  | 1.18E-01 | -0.014 | 4.36E-04 | 0.002  | 6.83E-01 | 0.004  | 2.66E-01 |
| 11 | rs10769282  | 47,626,492  | <i>MTCH2 (a)</i>              | -0.026 | 5.28E-05 | 0.028  | 1.57E-05 | -0.018 | 6.08E-03 | -0.021 | 8.94E-07 | 0.024  | 2.87E-08 | -0.016 | 2.27E-04 |
| 11 | rs71455793  | 65,715,204  | <i>TSGA10IP(d)</i>            | 0.043  | 2.19E-03 | 0.069  | 6.22E-07 | -0.082 | 4.45E-09 | 0.016  | 7.24E-02 | 0.035  | 1.45E-04 | -0.039 | 1.85E-05 |
| 11 | rs552846225 | 66,913,469  | <i>KDM2A (a)</i>              | 0.043  | 1.37E-05 | 0.064  | 1.07E-10 | -0.080 | 1.12E-15 | 0.023  | 4.32E-04 | 0.055  | 1.41E-16 | -0.064 | 6.82E-22 |
| 11 | rs4980661   | 69,306,579  | <i>MYEOV,<br/>CCND1 (a)</i>   | 0.027  | 3.60E-06 | -0.006 | 2.81E-01 | -0.007 | 2.27E-01 | 0.012  | 1.78E-03 | 0.006  | 1.44E-01 | -0.010 | 1.01E-02 |
| 11 | rs1789166   | 69,482,091  | <i>ORAOV1 (b)</i>             | -0.033 | 1.14E-07 | 0.009  | 1.53E-01 | 0.005  | 4.48E-01 | -0.014 | 4.97E-04 | 0.000  | 9.07E-01 | 0.006  | 1.64E-01 |
| 12 | rs34716573  | 576,037     | <i>B4GALNT3<br/>(a)</i>       | -0.007 | 2.59E-01 | -0.037 | 2.82E-09 | 0.039  | 2.75E-10 | -0.006 | 1.48E-01 | -0.016 | 7.69E-05 | 0.017  | 2.56E-05 |
| 12 | rs11049566  | 28,532,961  | <i>CCDC91 (a)</i>             | 0.010  | 1.05E-01 | 0.040  | 4.93E-10 | -0.042 | 6.78E-11 | 0.019  | 7.70E-06 | 0.022  | 4.27E-07 | -0.028 | 4.07E-11 |
| 12 | rs7306275   | 50,250,111  | <i>BCDIN3D,<br/>FAIM2 (a)</i> | 0.033  | 3.36E-08 | -0.023 | 1.74E-04 | 0.009  | 1.52E-01 | 0.019  | 3.03E-06 | -0.015 | 2.58E-04 | 0.006  | 1.31E-01 |
| 12 | rs11614785  | 50,880,422  | <i>LARP4 (b)</i>              | -0.015 | 1.62E-02 | -0.035 | 1.18E-08 | 0.040  | 1.37E-10 | -0.015 | 4.86E-04 | -0.020 | 1.05E-06 | 0.026  | 2.93E-10 |
| 12 | rs6489111   | 123,051,018 | <i>KNTC1 (a)</i>              | 0.011  | 7.41E-02 | -0.037 | 4.48E-09 | 0.031  | 7.98E-07 | 0.007  | 7.63E-02 | -0.019 | 4.52E-06 | 0.015  | 2.10E-04 |
| 13 | rs6492538   | 91,993,746  | <i>GPC5 (b)</i>               | -0.011 | 1.21E-01 | -0.036 | 3.32E-07 | 0.039  | 3.16E-08 | -0.006 | 2.38E-01 | -0.019 | 5.36E-05 | 0.021  | 8.33E-06 |
| 14 | rs71420186  | 50,960,918  | <i>MAP4K5 (b)</i>             | 0.024  | 4.19E-02 | -0.044 | 1.84E-04 | 0.031  | 8.78E-03 | 0.009  | 2.41E-01 | -0.033 | 2.79E-05 | 0.028  | 3.11E-04 |
| 15 | rs35874463  | 67,457,698  | <i>SMAD3(d)</i>               | -0.042 | 7.15E-04 | -0.053 | 2.04E-05 | 0.069  | 3.58E-08 | -0.023 | 5.32E-03 | -0.057 | 1.02E-11 | 0.064  | 1.44E-14 |
| 15 | rs12905253  | 74,232,437  | <i>PML (a)</i>                | 0.024  | 3.30E-05 | 0.031  | 8.42E-08 | -0.039 | 1.58E-11 | 0.012  | 2.66E-03 | 0.027  | 2.38E-12 | -0.032 | 1.65E-16 |
| 15 | rs11856122  | 84,576,348  | <i>ADAMTSL3<br/>(a)</i>       | 0.022  | 1.94E-04 | 0.051  | 1.80E-18 | -0.058 | 2.50E-23 | 0.030  | 1.08E-14 | 0.048  | 2.33E-35 | -0.058 | 1.02E-49 |
| 15 | rs11856122  | 89,361,669  | <i>RP11-<br/>343B18.2(c)</i>  | -0.013 | 2.74E-02 | -0.030 | 3.02E-07 | 0.034  | 7.24E-09 | -0.014 | 4.10E-04 | -0.015 | 8.18E-05 | 0.020  | 2.71E-07 |

|    |             |             |                                     |        |          |        |          |        |          |        |          |        |          |        |          |
|----|-------------|-------------|-------------------------------------|--------|----------|--------|----------|--------|----------|--------|----------|--------|----------|--------|----------|
| 15 | rs28584580  | 89,397,827  | <i>ACAN (a)</i>                     | 0.069  | 5.58E-05 | 0.091  | 8.51E-08 | -0.113 | 3.98E-11 | 0.065  | 1.78E-08 | 0.096  | 8.69E-17 | -0.118 | 6.82E-25 |
| 15 | rs3817428   | 89,415,247  | <i>ACAN (a)</i>                     | 0.027  | 3.84E-05 | 0.053  | 8.29E-16 | -0.061 | 1.59E-20 | 0.022  | 5.49E-07 | 0.045  | 2.43E-24 | -0.051 | 3.78E-31 |
| 15 | rs72755233  | 100,692,953 | <i>ADAMTS17(d)</i>                  | 0.038  | 3.87E-05 | 0.064  | 4.36E-12 | -0.074 | 5.09E-16 | 0.046  | 4.81E-14 | 0.065  | 6.94E-26 | -0.080 | 9.32E-39 |
| 15 | rs4988781   | 100,800,840 | <i>ADAMTS17 (a)</i>                 | -0.016 | 1.03E-02 | -0.028 | 9.99E-06 | 0.035  | 2.22E-08 | -0.015 | 2.28E-04 | -0.025 | 1.86E-09 | 0.031  | 5.25E-14 |
| 16 | rs369515117 | 28,862,780  | <i>SH2B1 (a)</i>                    | 0.015  | 1.45E-02 | -0.039 | 3.31E-10 | 0.033  | 1.21E-07 | 0.023  | 4.52E-08 | -0.030 | 3.32E-13 | 0.019  | 3.99E-06 |
| 16 | rs8050894   | 31,104,509  | <i>KAT8(c)</i>                      | -0.022 | 2.31E-04 | 0.003  | 6.48E-01 | 0.005  | 3.86E-01 | -0.027 | 8.83E-12 | 0.016  | 1.07E-04 | -0.005 | 2.42E-01 |
| 16 | rs55872725  | 53,809,123  | <i>FTO(a)</i>                       | 0.067  | 6.75E-30 | -0.009 | 1.16E-01 | -0.020 | 6.28E-04 | 0.062  | 3.20E-55 | -0.020 | 3.89E-07 | -0.006 | 1.22E-01 |
| 16 | rs8057620   | 69,884,619  | <i>RP11-419C5.2(c)</i>              | 0.035  | 2.27E-09 | -0.004 | 5.32E-01 | -0.010 | 8.99E-02 | 0.024  | 4.40E-10 | -0.007 | 6.13E-02 | -0.003 | 4.06E-01 |
| 16 | rs10584116  | 90,062,323  | <i>C16orf3(c)</i>                   | 0.011  | 2.81E-01 | 0.050  | 3.27E-07 | -0.052 | 8.99E-08 | 0.008  | 1.95E-01 | 0.029  | 7.41E-06 | -0.033 | 6.97E-07 |
| 17 | rs2071167   | 42,287,519  | <i>ASB16(c)</i>                     | 0.003  | 6.40E-01 | -0.031 | 5.91E-06 | 0.029  | 2.45E-05 | 0.011  | 1.75E-02 | -0.023 | 1.05E-06 | 0.018  | 1.00E-04 |
| 17 | rs2074188   | 45,888,251  | <i>SP6, SP2 (a)</i>                 | -0.002 | 6.91E-01 | -0.026 | 1.05E-05 | 0.027  | 2.98E-06 | -0.007 | 8.82E-02 | -0.017 | 1.46E-05 | 0.019  | 1.65E-06 |
| 17 | rs28394864  | 47,450,775  | <i>ZNF652 (b)</i>                   | 0.016  | 6.06E-03 | 0.029  | 9.48E-07 | -0.036 | 8.89E-10 | 0.013  | 6.51E-04 | 0.019  | 9.76E-07 | -0.024 | 1.70E-09 |
| 18 | rs4800148   | 20,724,328  | <i>RBBP8, CABLES1, C18orf45 (a)</i> | 0.017  | 1.81E-02 | 0.040  | 1.12E-08 | -0.044 | 3.88E-10 | 0.013  | 5.30E-03 | 0.035  | 1.20E-13 | -0.039 | 8.29E-17 |
| 18 | rs7236575   | 46,653,380  | <i>DYM (a)</i>                      | 0.024  | 4.48E-03 | 0.038  | 5.64E-06 | -0.046 | 4.65E-08 | 0.014  | 1.38E-02 | 0.017  | 2.84E-03 | -0.022 | 1.33E-04 |
| 18 | rs71336392  | 57,850,927  | <i>MC4R (a)</i>                     | 0.049  | 8.94E-13 | -0.022 | 1.55E-03 | 0.001  | 9.17E-01 | 0.048  | 2.58E-26 | -0.020 | 8.52E-06 | 0.000  | 9.94E-01 |
| 19 | rs62621197  | 8,670,147   | <i>ADAMTS10(d)</i>                  | 0.055  | 1.81E-03 | 0.087  | 8.48E-07 | -0.105 | 2.17E-09 | 0.060  | 9.82E-08 | 0.126  | 2.81E-29 | -0.147 | 3.45E-39 |
| 19 | rs10402308  | 19,657,500  | <i>GATAD2A (a)</i>                  | 0.010  | 1.84E-01 | 0.033  | 1.36E-05 | -0.035 | 4.11E-06 | 0.013  | 9.38E-03 | 0.012  | 1.97E-02 | -0.016 | 1.44E-03 |
| 19 | rs12971970  | 47,559,273  | <i>ZC3H4 (a)</i>                    | -0.029 | 2.38E-05 | 0.003  | 6.60E-01 | 0.008  | 2.38E-01 | -0.021 | 5.17E-06 | 0.011  | 1.32E-02 | -0.004 | 3.95E-01 |
| 20 | rs6085551   | 6,408,920   | <i>RP11-199O14.1 (b)</i>            | 0.007  | 2.27E-01 | 0.012  | 3.62E-02 | -0.015 | 1.26E-02 | 0.018  | 4.71E-06 | 0.015  | 1.32E-04 | -0.021 | 1.48E-07 |
| 20 | rs2145270   | 6,621,685   | <i>BMP2 (a)</i>                     | -0.032 | 7.14E-08 | -0.016 | 6.10E-03 | 0.027  | 8.82E-06 | -0.030 | 3.44E-14 | -0.019 | 1.97E-06 | 0.030  | 6.91E-14 |
| 20 | rs143384    | 34,025,756  | <i>GDF5 (a)</i>                     | -0.014 | 2.07E-02 | -0.045 | 2.27E-14 | 0.050  | 5.16E-17 | -0.012 | 2.83E-03 | -0.044 | 5.92E-28 | 0.047  | 7.71E-33 |

\* - The 'clump' function in PLINK was used to identify signals for association that were independent in each GWAS (see methods). Several the regions were associated with more than one of the three body fat ratios or associated with one body fat ratio in more than one of the strata (males, females or sex-combined). As a result, different leading SNPs were observed for different traits and strata at several loci. To assess whether these represented the same signal, we assessed the LD between the leading SNPs for different traits. SNPs in low LD with the most strongly associated SNP at each locus ( $R^2$ -value < 0.05) were considered to represent independent signals. The 'Locus' column denotes: (a) the reported gene from previous GWAS, (b) the most proximal gene, (c) the most strongly associated gene that is regulated by an eQTL in LD with the leading SNP, or (d) a gene containing a missense variant in LD with the leading SNP. Direction - summary of effect direction for the discovery and replication cohorts, with one '+' or '-' per cohort. All gene names are in italic font. Further data as well as annotations are available in Supplementary Data 1.



**Supplementary Table 5.** Independent signals\* for association with body fat ratios in males.

| CHR | RSID        | BP          | Locus name                 | Discovery     |           |               |           |               |           | Replication   |           |               |           |               |           |
|-----|-------------|-------------|----------------------------|---------------|-----------|---------------|-----------|---------------|-----------|---------------|-----------|---------------|-----------|---------------|-----------|
|     |             |             |                            | $\beta_{AFR}$ | $P_{AFR}$ | $\beta_{LFR}$ | $P_{LFR}$ | $\beta_{TFR}$ | $P_{TFR}$ | $\beta_{AFR}$ | $P_{AFR}$ | $\beta_{LFR}$ | $P_{LFR}$ | $\beta_{TFR}$ | $P_{TFR}$ |
| 1   | rs4846204   | 10,308,958  | <i>KIF1B (b)</i>           | -0.007        | 4.41E-01  | -0.028        | 2.94E-03  | 0.030         | 1.03E-03  | -0.013        | 4.63E-02  | -0.024        | 2.21E-04  | 0.027         | 2.82E-05  |
| 1   | rs55750792  | 17,306,870  | <i>MFAP2 (a)</i>           | -0.002        | 7.93E-01  | 0.013         | 4.00E-02  | -0.012        | 4.78E-02  | 0.002         | 5.59E-01  | 0.005         | 2.82E-01  | -0.006        | 1.35E-01  |
| 1   | rs2273368   | 113,063,771 | <i>WNT2B (a)</i>           | 0.010         | 2.01E-01  | -0.002        | 7.56E-01  | -0.001        | 9.01E-01  | 0.001         | 7.89E-01  | -0.008        | 1.28E-01  | 0.008         | 1.52E-01  |
| 1   | rs11205303  | 149,906,413 | <i>SF3B4 (a)</i>           | -0.014        | 2.76E-02  | -0.030        | 1.97E-06  | 0.033         | 9.70E-08  | 0.004         | 3.97E-01  | -0.038        | 1.77E-18  | 0.035         | 5.23E-16  |
| 1   | rs4971091   | 155,143,768 | <i>KRTCAP2 (b)</i>         | -0.016        | 1.20E-02  | 0.008         | 2.13E-01  | -0.002        | 7.49E-01  | -0.012        | 4.84E-03  | 0.003         | 4.66E-01  | 0.000         | 9.97E-01  |
| 1   | rs180921974 | 155,268,131 | <i>THBS3(d)</i>            | 0.036         | 8.13E-02  | 0.092         | 8.95E-06  | -0.104        | 6.51E-07  | 0.020         | 1.68E-01  | 0.083         | 6.79E-09  | -0.090        | 3.49E-10  |
| 1   | rs545608    | 177,899,121 | <i>SEC16B (a)</i>          | 0.021         | 6.88E-03  | -0.014        | 7.52E-02  | 0.005         | 5.15E-01  | 0.027         | 2.78E-07  | 0.002         | 7.53E-01  | -0.011        | 3.63E-02  |
| 1   | rs5779197   | 184,009,826 | <i>TSEN15, GLT25D2 (a)</i> | -0.003        | 6.45E-01  | -0.015        | 1.97E-02  | 0.016         | 1.58E-02  | -0.010        | 2.81E-02  | 0.002         | 6.82E-01  | 0.001         | 8.51E-01  |
| 1   | rs991967    | 218,615,451 | <i>TGFB2 (a)</i>           | 0.010         | 1.40E-01  | -0.011        | 1.21E-01  | 0.006         | 3.59E-01  | 0.002         | 6.65E-01  | 0.000         | 9.80E-01  | -0.001        | 7.60E-01  |
| 1   | rs2820443   | 219,753,509 | <i>LYPLAL1 (a)</i>         | 0.003         | 6.25E-01  | -0.006        | 3.48E-01  | 0.004         | 5.28E-01  | -0.001        | 8.03E-01  | -0.010        | 2.40E-02  | 0.010         | 3.28E-02  |
| 1   | rs10916174  | 227,804,041 | <i>ZNF678 (a)</i>          | 0.015         | 7.39E-02  | -0.006        | 4.82E-01  | 0.001         | 8.67E-01  | 0.004         | 5.31E-01  | -0.007        | 2.29E-01  | 0.006         | 2.83E-01  |
| 2   | rs62107261  | 422,144     | <i>FAM150B (a)</i>         | -0.042        | 0.003548  | 0.003         | 0.8195    | 0.014         | 0.3249    | -0.055        | 3.03E-08  | 0.016         | 1.05E-01  | 0.006         | 5.26E-01  |
| 2   | rs6731872   | 624,205     | <i>TMEM18 (a)</i>          | -0.040        | 1.01E-06  | -0.012        | 1.59E-01  | 0.026         | 1.36E-03  | -0.031        | 3.26E-08  | -0.009        | 1.08E-01  | 0.019         | 5.77E-04  |
| 2   | rs754537    | 25,176,277  | <i>RBJ, DNAJC27 (a)</i>    | 0.000         | 9.83E-01  | 0.002         | 7.68E-01  | -0.001        | 8.45E-01  | 0.000         | 9.20E-01  | 0.001         | 8.80E-01  | 0.000         | 9.72E-01  |
| 2   | rs17511102  | 37,960,613  | <i>CDC42EP3 (a)</i>        | -0.002        | 8.23E-01  | -0.038        | 4.37E-04  | 0.039         | 2.61E-04  | 0.009         | 2.40E-01  | -0.013        | 7.56E-02  | 0.009         | 2.24E-01  |
| 2   | rs7562173   | 46,976,217  | <i>SOCS5 (a)</i>           | 0.008         | 2.22E-01  | 0.001         | 8.63E-01  | -0.002        | 7.77E-01  | 0.002         | 6.85E-01  | -0.005        | 2.61E-01  | 0.005         | 2.72E-01  |
| 2   | rs3791679   | 56,096,892  | <i>EFEMP1 (a)</i>          | -0.010        | 1.72E-01  | 0.008         | 2.81E-01  | -0.002        | 7.45E-01  | -0.008        | 1.36E-01  | 0.018         | 5.79E-04  | -0.015        | 3.86E-03  |
| 2   | rs13011472  | 57,961,602  | <i>VRK2 (b)</i>            | -0.021        | 6.53E-04  | 0.011         | 7.94E-02  | -0.003        | 6.13E-01  | -0.011        | 8.25E-03  | 0.001         | 8.19E-01  | 0.004         | 3.35E-01  |
| 2   | rs148812496 | 198,540,352 | <i>RFTN (b)</i>            | -0.029        | 2.41E-04  | -0.019        | 1.36E-02  | 0.029         | 2.10E-04  | -0.012        | 2.10E-02  | -0.011        | 3.24E-02  | 0.016         | 2.33E-03  |
| 3   | rs4521268   | 49,137,904  | <i>WDR6(c)</i>             | 0.001         | 9.35E-01  | 0.017         | 7.76E-03  | -0.016        | 1.64E-02  | 0.000         | 9.74E-01  | 0.016         | 3.27E-04  | -0.017        | 1.86E-04  |
| 3   | rs1986599   | 50,034,637  | <i>RBM6 (b)</i>            | 0.002         | 8.67E-01  | 0.030         | 2.80E-03  | -0.031        | 1.85E-03  | 0.019         | 3.77E-03  | 0.017         | 1.05E-02  | -0.024        | 1.66E-04  |
| 3   | rs13069365  | 51,016,959  | <i>DOCK3 (a)</i>           | -0.041        | 1.00E-05  | 0.003         | 7.85E-01  | 0.012         | 1.83E-01  | -0.015        | 1.51E-02  | -0.007        | 2.50E-01  | 0.014         | 3.20E-02  |
| 3   | rs565817433 | 52,718,183  | <i>NEK4(c)</i>             | 0.005         | 4.07E-01  | 0.020         | 1.54E-03  | -0.023        | 1.88E-04  | 0.006         | 1.62E-01  | 0.003         | 4.75E-01  | -0.004        | 3.15E-01  |
| 3   | rs9853018   | 141,101,961 | <i>ZBTB38 (a)</i>          | 0.014         | 2.59E-02  | -0.003        | 6.43E-01  | -0.001        | 8.27E-01  | 0.015         | 3.56E-04  | 0.001         | 8.84E-01  | -0.006        | 1.33E-01  |

|   |             |             |                             |        |          |        |          |        |          |        |          |        |          |        |          |
|---|-------------|-------------|-----------------------------|--------|----------|--------|----------|--------|----------|--------|----------|--------|----------|--------|----------|
| 4 | rs2241069   | 8,602,798   | <i>CPZ (b)</i>              | -0.006 | 3.36E-01 | -0.004 | 5.30E-01 | 0.007  | 2.84E-01 | -0.001 | 8.03E-01 | -0.010 | 2.08E-02 | 0.009  | 2.90E-02 |
| 4 | rs79334166  | 17,859,466  | <i>FAM184B, C4orf30 (a)</i> | -0.023 | 1.16E-02 | 0.005  | 5.64E-01 | 0.003  | 7.55E-01 | -0.030 | 2.55E-06 | 0.020  | 1.43E-03 | -0.009 | 1.51E-01 |
| 4 | rs4694504   | 73,496,691  | <i>ADAMTS3 (a, c)</i>       | -0.011 | 6.66E-02 | -0.006 | 3.43E-01 | 0.009  | 1.50E-01 | -0.003 | 4.15E-01 | -0.016 | 1.84E-04 | 0.017  | 5.14E-05 |
| 4 | rs994014    | 82,165,790  | <i>PRKG2 (a)</i>            | -0.005 | 4.89E-01 | 0.004  | 5.78E-01 | -0.003 | 6.80E-01 | -0.010 | 2.64E-02 | -0.006 | 1.97E-01 | 0.008  | 9.73E-02 |
| 4 | rs7680661   | 145,565,116 | <i>HHIP (a)</i>             | -0.001 | 8.94E-01 | 0.016  | 5.03E-02 | -0.016 | 5.74E-02 | 0.001  | 9.02E-01 | 0.010  | 7.25E-02 | -0.010 | 8.82E-02 |
| 5 | rs465983    | 55,812,130  | <i>MAP3K1 (a)</i>           | 0.008  | 2.66E-01 | -0.015 | 3.57E-02 | 0.013  | 7.14E-02 | -0.001 | 8.89E-01 | -0.017 | 7.19E-04 | 0.017  | 5.66E-04 |
| 5 | rs34341     | 74,934,009  | <i>ANKDD1B(c)</i>           | -0.011 | 7.99E-02 | -0.002 | 8.01E-01 | 0.004  | 4.98E-01 | -0.005 | 2.43E-01 | -0.008 | 5.24E-02 | 0.011  | 9.57E-03 |
| 5 | rs115912456 | 82,815,158  | <i>VCAN (a)</i>             | 0.069  | 8.19E-06 | 0.042  | 7.13E-03 | -0.061 | 7.67E-05 | 0.026  | 1.68E-02 | 0.013  | 2.19E-01 | -0.022 | 3.84E-02 |
| 5 | rs3812049   | 127,418,850 | <i>SLC12A2 (b)</i>          | 0.061  | 9.24E-18 | -0.049 | 4.15E-12 | 0.026  | 2.36E-04 | 0.055  | 1.15E-29 | -0.035 | 1.38E-12 | 0.014  | 3.42E-03 |
| 5 | rs1317415   | 157,952,404 | <i>RPI1-32D16.1 (b)</i>     | -0.007 | 3.06E-01 | 0.002  | 7.82E-01 | 0.001  | 9.22E-01 | 0.006  | 2.08E-01 | -0.011 | 2.25E-02 | 0.009  | 5.12E-02 |
| 5 | rs351855    | 176,520,243 | <i>FGFR4 (a)</i>            | 0.034  | 4.24E-07 | -0.012 | 7.72E-02 | 0.001  | 9.22E-01 | 0.021  | 8.00E-06 | -0.001 | 7.63E-01 | -0.006 | 2.02E-01 |
| 5 | rs34022431  | 176,677,563 | <i>NSD1 (b)</i>             | 0.062  | 1.56E-03 | -0.002 | 9.16E-01 | -0.018 | 3.64E-01 | 0.018  | 1.70E-01 | 0.015  | 2.54E-01 | -0.020 | 1.34E-01 |
| 5 | rs888762    | 178,547,313 | <i>ADAMTS2 (b)</i>          | -0.010 | 1.26E-01 | -0.012 | 6.69E-02 | 0.015  | 2.21E-02 | 0.001  | 8.99E-01 | -0.011 | 1.88E-02 | 0.011  | 1.50E-02 |
| 6 | rs41271299  | 19,839,415  | <i>ID4 (a)</i>              | 0.009  | 5.31E-01 | 0.001  | 9.49E-01 | -0.001 | 9.53E-01 | 0.002  | 8.72E-01 | 0.003  | 7.73E-01 | -0.005 | 6.31E-01 |
| 6 | rs9358913   | 26,239,404  | <i>HIST1H2BE (a)</i>        | -0.005 | 4.81E-01 | -0.003 | 7.18E-01 | 0.005  | 4.88E-01 | 0.014  | 4.07E-03 | 0.003  | 5.53E-01 | -0.006 | 2.05E-01 |
| 6 | rs9469762   | 34,236,430  | <i>HMGA1 (a)</i>            | 0.016  | 4.05E-01 | -0.001 | 9.42E-01 | -0.005 | 8.12E-01 | 0.021  | 9.68E-02 | 0.023  | 8.02E-02 | -0.028 | 3.16E-02 |
| 6 | rs2492863   | 34,603,646  | <i>C6orf106 (b)</i>         | 0.007  | 4.53E-01 | -0.014 | 1.12E-01 | 0.011  | 2.24E-01 | 0.014  | 2.31E-02 | 0.000  | 9.77E-01 | -0.005 | 3.88E-01 |
| 6 | rs2635727   | 50,820,940  | <i>TFAP2 (a)</i>            | -0.027 | 1.92E-04 | 0.005  | 4.68E-01 | 0.004  | 5.84E-01 | -0.019 | 1.28E-04 | 0.013  | 9.34E-03 | -0.004 | 4.25E-01 |
| 6 | rs314263    | 105,392,745 | <i>LIN28B (a)</i>           | -0.004 | 5.75E-01 | -0.025 | 1.33E-04 | 0.026  | 6.94E-05 | -0.012 | 8.17E-03 | -0.031 | 1.94E-11 | 0.033  | 2.36E-13 |
| 6 | rs6570507   | 142,679,572 | <i>GPR126 (a)</i>           | -0.004 | 5.37E-01 | 0.012  | 7.36E-02 | -0.010 | 1.45E-01 | 0.004  | 4.25E-01 | 0.017  | 2.71E-04 | -0.019 | 3.88E-05 |
| 6 | rs2982708   | 152,356,220 | <i>ESR1 (a)</i>             | -0.005 | 4.32E-01 | 0.010  | 1.56E-01 | -0.006 | 3.75E-01 | 0.001  | 9.06E-01 | -0.009 | 5.40E-02 | 0.009  | 5.44E-02 |
| 7 | rs798491    | 2,800,521   | <i>AMZ1 (a)</i>             | -0.011 | 9.18E-02 | 0.023  | 5.88E-04 | -0.016 | 1.48E-02 | -0.014 | 3.19E-03 | 0.021  | 6.18E-06 | -0.016 | 5.70E-04 |
| 7 | rs3823974   | 20,442,796  | <i>ITGB8 (b)</i>            | -0.003 | 6.04E-01 | 0.001  | 8.47E-01 | 0.000  | 9.38E-01 | 0.006  | 2.03E-01 | 0.005  | 2.21E-01 | -0.006 | 1.85E-01 |
| 7 | rs481806    | 28,207,300  | <i>JAZF1 (a)</i>            | -0.019 | 3.91E-03 | -0.003 | 6.31E-01 | 0.010  | 1.35E-01 | -0.004 | 3.53E-01 | -0.009 | 5.46E-02 | 0.010  | 3.72E-02 |
| 7 | rs527582137 | 92,251,321  | <i>CDK6 (a)</i>             | 0.008  | 2.39E-01 | 0.010  | 1.59E-01 | -0.013 | 7.20E-02 | 0.011  | 3.15E-02 | -0.011 | 3.12E-02 | 0.007  | 1.61E-01 |
| 7 | rs112416074 | 148,647,760 | <i>PDIA4 (a)</i>            | 0.002  | 8.05E-01 | -0.019 | 2.25E-02 | 0.016  | 5.41E-02 | 0.005  | 4.14E-01 | -0.008 | 1.55E-01 | 0.006  | 2.55E-01 |
| 7 | rs56282717  | 150,657,095 | <i>KCNH2 (b)</i>            | -0.031 | 2.33E-05 | 0.003  | 7.10E-01 | 0.008  | 3.02E-01 | -0.017 | 8.27E-04 | -0.002 | 6.66E-01 | 0.009  | 8.62E-02 |

|    |             |             |                               |        |          |        |          |        |          |        |          |        |          |        |          |
|----|-------------|-------------|-------------------------------|--------|----------|--------|----------|--------|----------|--------|----------|--------|----------|--------|----------|
| 8  | rs2044387   | 8,907,950   | <i>ERII (b)</i>               | 0.000  | 9.62E-01 | 0.000  | 9.69E-01 | 0.000  | 9.70E-01 | 0.010  | 2.32E-02 | -0.002 | 6.23E-01 | -0.002 | 6.62E-01 |
| 8  | rs12546366  | 10,802,146  | <i>XKR6 (b)</i>               | 0.005  | 3.83E-01 | 0.005  | 4.23E-01 | -0.005 | 4.12E-01 | 0.018  | 2.46E-05 | 0.009  | 2.80E-02 | -0.015 | 4.05E-04 |
| 8  | rs4733727   | 130,731,484 | <i>MLZE,<br/>GSDMC (a)</i>    | -0.005 | 3.88E-01 | 0.004  | 4.90E-01 | -0.002 | 7.02E-01 | -0.006 | 1.36E-01 | 0.007  | 1.11E-01 | -0.003 | 4.21E-01 |
| 9  | rs10962638  | 16,846,111  | <i>BNC2 (b)</i>               | 0.008  | 3.85E-01 | 0.021  | 1.87E-02 | -0.024 | 8.75E-03 | 0.000  | 9.90E-01 | 0.008  | 1.59E-01 | -0.008 | 1.84E-01 |
| 9  | rs35344761  | 78,510,823  | <i>PCSK5 (a)</i>              | -0.003 | 7.17E-01 | 0.020  | 3.79E-02 | -0.016 | 9.20E-02 | 0.006  | 3.61E-01 | 0.006  | 3.30E-01 | -0.010 | 1.44E-01 |
| 9  | rs7039458   | 86,639,999  | <i>RMI1 (c,d)</i>             | 0.019  | 8.65E-03 | -0.016 | 2.94E-02 | 0.010  | 1.84E-01 | 0.003  | 5.31E-01 | -0.021 | 1.67E-05 | 0.020  | 6.07E-05 |
| 9  | rs3780327   | 129,945,847 | <i>RALGPS1 (b)</i>            | 0.003  | 6.90E-01 | -0.035 | 4.33E-06 | 0.032  | 2.39E-05 | 0.005  | 3.32E-01 | -0.022 | 2.20E-05 | 0.020  | 1.09E-04 |
| 10 | rs34821335  | 72,433,203  | <i>ADAMTS14(c)</i>            | -0.019 | 7.45E-03 | 0.008  | 2.64E-01 | -0.001 | 8.39E-01 | -0.013 | 7.91E-03 | -0.005 | 3.29E-01 | 0.009  | 7.38E-02 |
| 10 | rs11289753  | 96,026,184  | <i>PLCE1 (b)</i>              | 0.042  | 1.10E-11 | -0.004 | 5.52E-01 | -0.009 | 1.32E-01 | 0.033  | 1.71E-14 | -0.006 | 1.59E-01 | -0.006 | 1.92E-01 |
| 11 | rs1138714   | 825,110     | <i>AP006621.1<br/>(b)</i>     | -0.023 | 2.63E-04 | 0.004  | 5.55E-01 | 0.004  | 5.68E-01 | -0.010 | 1.82E-02 | 0.001  | 7.67E-01 | 0.003  | 4.55E-01 |
| 11 | rs10769282  | 47,626,492  | <i>MTCH2 (a)</i>              | -0.018 | 8.53E-03 | 0.025  | 2.87E-04 | -0.017 | 1.36E-02 | -0.015 | 9.87E-04 | 0.019  | 5.02E-05 | -0.012 | 7.71E-03 |
| 11 | rs71455793  | 65,715,204  | <i>TSGA10IP(d)</i>            | 0.023  | 1.20E-01 | 0.022  | 1.35E-01 | -0.024 | 1.10E-01 | 0.020  | 4.74E-02 | -0.009 | 3.71E-01 | 0.006  | 5.65E-01 |
| 11 | rs552846225 | 66,913,469  | <i>KDM2A (a)</i>              | 0.007  | 5.12E-01 | 0.031  | 2.79E-03 | -0.032 | 2.81E-03 | 0.002  | 7.97E-01 | 0.009  | 2.06E-01 | -0.008 | 2.60E-01 |
| 11 | rs4980661   | 69,306,579  | <i>MYEOV,<br/>CCND1 (a)</i>   | 0.021  | 7.50E-04 | -0.010 | 1.12E-01 | 0.003  | 6.58E-01 | 0.013  | 1.77E-03 | -0.001 | 7.54E-01 | -0.004 | 4.08E-01 |
| 11 | rs1789166   | 69,482,091  | <i>ORAOV1 (b)</i>             | -0.020 | 2.01E-03 | 0.013  | 5.25E-02 | -0.004 | 4.90E-01 | -0.011 | 1.20E-02 | 0.006  | 1.94E-01 | -0.002 | 6.10E-01 |
| 12 | rs34716573  | 576,037     | <i>B4GALNT3<br/>(a)</i>       | 0.001  | 8.40E-01 | -0.006 | 3.79E-01 | 0.007  | 2.89E-01 | 0.004  | 3.82E-01 | -0.001 | 8.23E-01 | -0.001 | 7.53E-01 |
| 12 | rs11049566  | 28,532,961  | <i>CCDC91 (a)</i>             | 0.014  | 4.11E-02 | 0.010  | 1.28E-01 | -0.013 | 5.48E-02 | 0.009  | 4.53E-02 | 0.003  | 5.43E-01 | -0.006 | 1.85E-01 |
| 12 | rs7306275   | 50,250,111  | <i>BCDIN3D,<br/>FAIM2 (a)</i> | 0.015  | 1.85E-02 | -0.012 | 5.68E-02 | 0.007  | 3.03E-01 | 0.014  | 2.07E-03 | -0.004 | 3.18E-01 | -0.001 | 7.87E-01 |
| 12 | rs11614785  | 50,880,422  | <i>LARP4 (b)</i>              | -0.015 | 2.58E-02 | 0.009  | 1.63E-01 | -0.003 | 6.06E-01 | -0.009 | 4.60E-02 | 0.004  | 3.38E-01 | -0.002 | 6.27E-01 |
| 12 | rs6489111   | 123,051,018 | <i>KNTC1 (a)</i>              | 0.001  | 9.18E-01 | -0.006 | 3.36E-01 | 0.005  | 4.30E-01 | 0.014  | 1.85E-03 | -0.001 | 7.95E-01 | -0.004 | 3.27E-01 |
| 13 | rs6492538   | 91,993,746  | <i>GPC5 (b)</i>               | 0.000  | 9.92E-01 | -0.001 | 9.46E-01 | -0.002 | 8.27E-01 | -0.003 | 5.71E-01 | 0.003  | 5.46E-01 | -0.003 | 5.87E-01 |
| 14 | rs71420186  | 50,960,918  | <i>MAP4K5 (b)</i>             | 0.035  | 6.04E-03 | -0.056 | 9.99E-06 | 0.042  | 8.35E-04 | 0.014  | 1.15E-01 | -0.045 | 1.82E-07 | 0.038  | 8.79E-06 |
| 15 | rs35874463  | 67,457,698  | <i>SMAD3(d)</i>               | 0.003  | 8.36E-01 | -0.005 | 6.74E-01 | 0.007  | 6.13E-01 | 0.008  | 3.99E-01 | -0.035 | 1.42E-04 | 0.028  | 2.37E-03 |
| 15 | rs12905253  | 74,232,437  | <i>PML (a)</i>                | 0.007  | 2.89E-01 | 0.004  | 5.09E-01 | -0.005 | 4.09E-01 | 0.011  | 8.21E-03 | 0.008  | 7.02E-02 | -0.011 | 1.21E-02 |
| 15 | rs11856122  | 84,576,348  | <i>ADAMTSL3<br/>(a)</i>       | 0.031  | 4.29E-07 | -0.012 | 5.48E-02 | -0.001 | 9.27E-01 | 0.026  | 4.98E-10 | -0.003 | 5.48E-01 | -0.006 | 1.64E-01 |
| 15 | rs11856122  | 89,361,669  | <i>RP11-<br/>343B18.2(c)</i>  | 0.000  | 9.68E-01 | -0.007 | 2.57E-01 | 0.006  | 3.44E-01 | 0.004  | 3.56E-01 | -0.011 | 8.22E-03 | 0.010  | 2.32E-02 |

|    |             |             |                                     |        |          |        |          |        |          |        |          |        |          |        |          |
|----|-------------|-------------|-------------------------------------|--------|----------|--------|----------|--------|----------|--------|----------|--------|----------|--------|----------|
| 15 | rs28584580  | 89,397,827  | <i>ACAN (a)</i>                     | 0.006  | 7.27E-01 | -0.044 | 1.76E-02 | 0.039  | 3.56E-02 | 0.018  | 1.50E-01 | -0.017 | 1.72E-01 | 0.013  | 2.83E-01 |
| 15 | rs3817428   | 89,415,247  | <i>ACAN (a)</i>                     | 0.013  | 6.61E-02 | 0.007  | 2.89E-01 | -0.012 | 8.44E-02 | 0.025  | 1.74E-07 | 0.004  | 3.56E-01 | -0.012 | 9.82E-03 |
| 15 | rs72755233  | 100,692,953 | <i>ADAMTS17(d)</i>                  | 0.022  | 2.29E-02 | 0.002  | 8.38E-01 | -0.010 | 3.24E-01 | 0.018  | 6.86E-03 | 0.015  | 2.86E-02 | -0.021 | 1.83E-03 |
| 15 | rs4988781   | 100,800,840 | <i>ADAMTS17 (a)</i>                 | 0.001  | 8.60E-01 | 0.000  | 9.50E-01 | 0.000  | 9.85E-01 | 0.004  | 3.93E-01 | -0.011 | 1.32E-02 | 0.009  | 4.68E-02 |
| 16 | rs369515117 | 28,862,780  | <i>SH2B1 (a)</i>                    | 0.012  | 6.09E-02 | -0.014 | 3.68E-02 | 0.008  | 1.98E-01 | 0.015  | 7.33E-04 | -0.019 | 2.09E-05 | 0.013  | 4.26E-03 |
| 16 | rs8050894   | 31,104,509  | <i>KAT8(c)</i>                      | -0.025 | 9.78E-05 | 0.002  | 7.88E-01 | 0.005  | 4.03E-01 | -0.006 | 1.65E-01 | 0.003  | 5.15E-01 | -0.001 | 8.00E-01 |
| 16 | rs55872725  | 53,809,123  | <i>FTO(a)</i>                       | 0.045  | 9.81E-13 | -0.002 | 7.29E-01 | -0.016 | 1.21E-02 | 0.036  | 1.39E-16 | 0.005  | 2.70E-01 | -0.021 | 1.26E-06 |
| 16 | rs8057620   | 69,884,619  | <i>RP11-419C5.2(c)</i>              | -0.008 | 1.93E-01 | -0.022 | 3.64E-04 | 0.022  | 3.97E-04 | 0.009  | 2.65E-02 | -0.014 | 1.38E-03 | 0.010  | 1.78E-02 |
| 16 | rs10584116  | 90,062,323  | <i>C16orf3(c)</i>                   | 0.009  | 4.11E-01 | 0.002  | 8.42E-01 | -0.005 | 6.04E-01 | 0.014  | 4.45E-02 | -0.002 | 7.64E-01 | -0.001 | 9.01E-01 |
| 17 | rs2071167   | 42,287,519  | <i>ASB16(c)</i>                     | -0.014 | 5.93E-02 | -0.025 | 4.52E-04 | 0.029  | 6.80E-05 | -0.003 | 5.01E-01 | -0.002 | 7.03E-01 | 0.003  | 5.41E-01 |
| 17 | rs2074188   | 45,888,251  | <i>SP6, SP2 (a)</i>                 | 0.000  | 9.88E-01 | -0.019 | 2.17E-03 | 0.018  | 3.09E-03 | -0.006 | 1.73E-01 | 0.001  | 7.93E-01 | 0.001  | 7.30E-01 |
| 17 | rs28394864  | 47,450,775  | <i>ZNF652 (b)</i>                   | 0.004  | 5.09E-01 | 0.006  | 2.92E-01 | -0.007 | 2.37E-01 | 0.019  | 1.49E-05 | 0.007  | 9.58E-02 | -0.012 | 6.58E-03 |
| 18 | rs4800148   | 20,724,328  | <i>RBBP8, CABLES1, C18orf45 (a)</i> | -0.003 | 7.14E-01 | -0.011 | 1.30E-01 | 0.012  | 1.15E-01 | 0.008  | 1.19E-01 | -0.009 | 8.32E-02 | 0.006  | 2.48E-01 |
| 18 | rs7236575   | 46,653,380  | <i>DYM (a)</i>                      | -0.004 | 6.51E-01 | 0.031  | 5.34E-04 | -0.030 | 7.15E-04 | -0.001 | 8.34E-01 | 0.005  | 4.65E-01 | -0.005 | 4.30E-01 |
| 18 | rs71336392  | 57,850,927  | <i>MC4R (a)</i>                     | 0.037  | 4.54E-07 | 0.001  | 8.66E-01 | -0.017 | 1.87E-02 | 0.048  | 8.48E-22 | -0.003 | 5.80E-01 | -0.014 | 6.21E-03 |
| 19 | rs62621197  | 8,670,147   | <i>ADAMTS10(d)</i>                  | 0.007  | 7.16E-01 | 0.028  | 1.33E-01 | -0.029 | 1.22E-01 | 0.007  | 5.65E-01 | 0.037  | 2.75E-03 | -0.036 | 3.03E-03 |
| 19 | rs10402308  | 19,657,500  | <i>GATAD2A (a)</i>                  | -0.027 | 9.45E-04 | 0.036  | 7.06E-06 | -0.026 | 1.22E-03 | -0.016 | 3.75E-03 | 0.017  | 1.71E-03 | -0.013 | 1.79E-02 |
| 19 | rs12971970  | 47,559,273  | <i>ZC3H4 (a)</i>                    | -0.025 | 4.69E-04 | 0.004  | 5.37E-01 | 0.005  | 5.24E-01 | -0.015 | 2.17E-03 | -0.012 | 1.97E-02 | 0.017  | 5.58E-04 |
| 20 | rs6085551   | 6,408,920   | <i>RP11-199O14.1 (b)</i>            | 0.035  | 2.18E-08 | -0.004 | 5.18E-01 | -0.005 | 3.80E-01 | 0.011  | 1.14E-02 | -0.002 | 7.22E-01 | -0.001 | 8.47E-01 |
| 20 | rs2145270   | 6,621,685   | <i>BMP2 (a)</i>                     | -0.022 | 7.20E-04 | 0.008  | 2.29E-01 | 0.001  | 9.10E-01 | -0.009 | 4.33E-02 | 0.008  | 5.38E-02 | -0.006 | 1.96E-01 |
| 20 | rs143384    | 34,025,756  | <i>GDF5 (a)</i>                     | 0.035  | 1.34E-08 | -0.029 | 3.25E-06 | 0.017  | 0.01     | 0.025  | 1.29E-08 | -0.017 | 7.22E-05 | 0.009  | 4.48E-02 |

\* - The 'clump' function in PLINK was used to identify signals for association that were independent in each GWAS (see methods). Several the regions were associated with more than one of the three body fat ratios or associated with one body fat ratio in more than one of the strata (males, females or sex-combined). As a result, different leading SNPs were observed for different traits and strata at several loci. To assess whether these represented the same signal, we assessed the LD between the leading SNPs for different traits. SNPs in low LD with the most strongly associated SNP at each locus ( $R^2$ -value < 0.05) were considered to represent independent signals. The 'Locus' column denotes: (a) the reported gene from previous GWAS, (b) the most proximal gene, (c) the most strongly associated gene that is regulated by an eQTL in LD with the leading SNP, or (d) a gene containing a missense variant in LD with the leading SNP. Direction - summary of effect direction for the discovery and replication cohorts, with one '+' or '-' per cohort. All gene names are in italic font. Further data as well as annotations are available in Supplementary Data 1.

**Supplementary Table 6. Direction of effect for body fat ratio-associated lead SNPs for standard anthropometric traits in the UK biobank cohort.** CHR – chromosome. BP – position in base pairs of lead SNP, AFR – Arm fat ratio, LFR – leg fat ratio, TFR – trunk fat ratio, – BMI – body mass index, WC – waist circumference, WHR – Waist-to-hip ratio, WCadjBMI – waist circumference adjusted for BMI, WHRadjBMI – waist-to-hip ratio adjusted for BMI. '+' – the direction of effect of the minor allele is positive. '-' – the direction of effect of the minor allele is negative. Direction of effects are shown for all traits that were associated ( $P < 1*10^{-7}$ ) with the SNPs.

| Phenotype in previous GWAS                         | SNP         | CHR | BP          | AFR | LFR | TFR | BMI | Height | WC | WHR | WC-adj BMI | WHR-adj BMI |
|----------------------------------------------------|-------------|-----|-------------|-----|-----|-----|-----|--------|----|-----|------------|-------------|
| Appendicular lean mass                             | rs115912456 | 5   | 82,815,158  |     | -   | +   |     |        |    |     |            |             |
| Birth weight                                       | rs2074188   | 17  | 45,888,251  |     | -   | +   |     |        |    |     |            |             |
| Body fat percentage, WC, Obesity, BMI, Weight,     | rs369515117 | 16  | 28,862,780  |     | -   | +   | +   |        |    | +   |            |             |
| Height                                             | rs9853018   | 3   | 141,101,961 |     | -   | +   |     | +      |    | +   |            | +           |
| Height                                             | rs41271299  | 6   | 19,839,415  |     | -   | +   |     | +      |    |     |            | +           |
| Height, HCadjBMI                                   | rs991967    | 1   | 218,615,451 |     | -   | +   |     | +      |    |     |            | +           |
| Height, HCadjBMI                                   | rs994014    | 4   | 82,165,790  |     | -   | +   |     | +      |    |     |            | +           |
| Height, HCadjBMI                                   | rs34716573  | 12  | 576,037     |     | -   | +   |     | +      |    |     |            | +           |
| Height, HCadjBMI, WCadjBMI                         | rs4694504   | 4   | 73,496,691  |     | -   | +   |     | +      |    |     |            | +           |
| Height, Infant length, Hip circumference, HCadjBMI | rs143384    | 20  | 34,025,756  |     | -   | +   |     | +      |    |     |            | +           |
| Height, WCadjBMI                                   | rs5779197   | 1   | 184,009,826 |     | -   | +   |     | +      |    |     |            | +           |
| Height, WCadjBMI                                   | rs314263    | 6   | 105,392,745 |     | -   | +   |     | +      |    |     |            | +           |
| Infant length, Height, WCadjBMI, HCadjBMI          | rs11205303  | 1   | 149,906,413 |     | -   | +   |     | +      |    |     |            | +           |
| WHRadjBMI, Hip circumference, HCadjBMI             | rs2820443   | 1   | 219,753,509 |     | -   | +   |     |        | -  |     | -          |             |
| Height                                             | rs17511102  | 2   | 37,960,613  |     |     | +   |     | +      |    |     |            |             |
| Height                                             | rs13069365  | 3   | 51,016,959  |     |     | +   |     | +      |    |     |            |             |
| Height                                             | rs2982708   | 6   | 152,356,220 |     |     | +   |     | +      |    |     |            |             |

| Phenotype in previous GWAS      | SNP         | CHR | BP          | AFR | LFR | TFR | BMI | Height | WC | WHR | WC-adj BMI | WHR-adj BMI |
|---------------------------------|-------------|-----|-------------|-----|-----|-----|-----|--------|----|-----|------------|-------------|
| Height                          | rs112416074 | 7   | 148,647,760 |     |     | +   |     | +      |    |     |            |             |
| Height                          | rs4988781   | 15  | 100,800,840 |     |     | +   |     | +      |    |     |            | +           |
| WCadjBMI                        | rs481806    | 7   | 28,207,300  |     |     | +   |     | +      |    |     |            | +           |
| WCadjBMI                        | rs527582137 | 7   | 92,251,321  |     |     | +   |     | +      |    |     |            |             |
| WHRadjBMI                       | rs465983    | 5   | 55,812,130  |     |     | +   |     |        | +  |     | +          | +           |
| Height                          | rs11856122  | 15  | 84,576,348  | +   | +   | -   |     | -      |    |     |            | -           |
| Height                          | rs10402308  | 19  | 19,657,500  | -   | +   | -   |     | -      |    |     |            |             |
| Height                          | rs7680661   | 4   | 145,565,116 |     | +   | -   |     | -      |    |     |            | -           |
| Height                          | rs552846225 | 11  | 66,913,469  |     | +   | -   |     | -      |    |     |            | -           |
| Height                          | rs12905253  | 15  | 74,232,437  |     | +   | -   |     | -      |    |     |            |             |
| Height                          | rs28584580  | 15  | 89,397,827  |     | +   | -   |     | -      |    |     |            | -           |
| Height                          | rs7236575   | 18  | 46,653,380  |     | +   | -   |     | -      |    |     |            |             |
| Height, Infant length, WCadjBMI | rs3817428   | 15  | 89,415,247  |     | +   | -   |     | -      |    |     |            | -           |
| Height, WCadjBMI                | rs9358913   | 6   | 26,239,404  |     | +   | -   |     | -      |    | -   |            |             |
| Height, WCadjBMI                | rs35344761  | 9   | 78,510,823  |     | +   | -   |     | -      |    |     |            | -           |
| Height, WCadjBMI                | rs4800148   | 18  | 20,724,328  |     | +   | -   |     | -      |    | -   |            | -           |
| Height, WCadjBMI, Birth weight  | rs798491    | 7   | 2,800,521   |     | +   | -   |     | -      |    |     |            | -           |
| Height, WCadjBMI, HCadjBMI      | rs3791679   | 2   | 56,096,892  |     | +   | -   |     | -      |    | -   |            | -           |
| Height, WCadjBMI, HCadjBMI      | rs11049566  | 12  | 28,532,961  |     | +   | -   |     | -      |    |     |            | -           |
| WCadjBMI                        | rs2273368   | 1   | 113,063,771 |     | +   | -   |     | -      |    |     |            |             |
| Height                          | rs351855    | 5   | 176,520,243 | +   |     | -   |     |        |    |     |            | -           |
| Height, WHRadjBMI, WCadjBMI     | rs2145270   | 20  | 6,621,685   | -   |     | -   | -   | +      |    |     | +          | +           |
| Height                          | rs10916174  | 1   | 227,804,041 |     |     | -   |     | -      |    |     |            | -           |
| Height                          | rs79334166  | 4   | 17,859,466  |     |     | -   |     | -      |    |     |            |             |

| Phenotype in previous GWAS                    | SNP        | CHR | BP          | AFR | LF | TFR | BMI | Height | WC | WHR | WC-adj BMI | WHR-adj BMI |
|-----------------------------------------------|------------|-----|-------------|-----|----|-----|-----|--------|----|-----|------------|-------------|
| Height                                        | rs4733727  | 8   | 130,731,484 |     |    | -   |     | -      |    |     |            | -           |
| Height, Waist circumference adjusted for BMI  | rs55750792 | 1   | 17,306,870  |     |    | -   |     | -      |    |     |            | -           |
| Height, WCadjBMI                              | rs6570507  | 6   | 142,679,572 |     |    | -   |     | -      |    |     |            | -           |
| BMI                                           | rs10769282 | 11  | 47,626,492  |     | +  |     | -   |        |    | -   |            |             |
| BMI                                           | rs6489111  | 12  | 123,051,018 |     | -  |     |     | +      |    |     |            |             |
| Height                                        | rs9469762  | 6   | 34,236,430  |     | -  |     |     | +      |    |     |            |             |
| BMI, Body fat percentage, Waist-hip ratio     | rs55872725 | 16  | 53,809,123  | +   |    |     | +   |        | +  | +   |            |             |
| Height, BMI, Obesity                          | rs71336392 | 18  | 57,850,927  | +   |    |     | +   | +      | +  | +   |            |             |
| Hip circumference, Body mass index            | rs4980661  | 11  | 69,306,579  | +   |    |     | +   |        |    |     |            |             |
| Obesity, Body mass index                      | rs7306275  | 12  | 50,250,111  | +   |    |     | +   |        |    | +   |            |             |
| Obesity, Body mass index, Waist circumference | rs545608   | 1   | 177,899,121 | +   |    |     | +   |        | +  | +   |            |             |
| BMI, Waist circumference, Hip circumference   | rs12971970 | 19  | 47,559,273  | -   |    |     | -   |        |    | -   |            |             |
| Body mass index                               | rs6731872  | 2   | 624,205     | -   |    |     | -   |        | -  | -   |            |             |
| Height                                        | rs754537   | 2   | 25,176,277  | -   |    |     | -   | +      |    | -   |            |             |
| Height                                        | rs7562173  | 2   | 46,976,217  | -   |    |     | -   | +      |    |     |            |             |
| WHR                                           | rs2635727  | 6   | 50,820,940  | -   |    |     | -   |        |    | -   |            |             |

**Supplementary Table 7. Overlap between body fat ratio-associated loci with cardiovascular-, and metabolic disease-associations from previous GWAS.** Lead SNPs were cross-referenced with GWAS-catalog. LDs between SNPs were calculated in the data from the UK Biobank. SNPs with  $R^2 > 0.1$  were considered to possibly represent the same signal.

| <b>Ratio-associated SNP</b> | <b>Chr</b> | <b>BP</b>   | <b>Locus</b>            | <b>Gwas_catalog_snps</b>                                                               | <b>Gwas_catalog_trait</b>                                                                                                 |
|-----------------------------|------------|-------------|-------------------------|----------------------------------------------------------------------------------------|---------------------------------------------------------------------------------------------------------------------------|
| rs2273368                   | 1          | 113,063,771 | <i>WNT2B (a)</i>        | rs17030613, rs12129649, rs112416932                                                    | Blood pressure, Diastolic blood pressure, Mean platelet volume, Platelet count, Platelet distribution width, Plateletcrit |
| rs6731872                   | 2          | 624,205     | <i>TMEM18 (a)</i>       | rs2867125                                                                              | Type 2 diabetes                                                                                                           |
| rs754537                    | 2          | 25,176,277  | <i>RBJ, DNAJC27 (a)</i> | rs55701159, rs478222                                                                   | Diastolic blood pressure, Type 1 diabetes                                                                                 |
| rs148812496                 | 2          | 198,540,352 | <i>RFTN(b)</i>          | rs1147169                                                                              | Low high density lipoprotein cholesterol levels                                                                           |
| rs1986599                   | 3          | 50,034,637  | <i>RBM6 (b)</i>         | rs2013208                                                                              | HDL cholesterol levels                                                                                                    |
| rs13069365                  | 3          | 51,016,959  | <i>DOCK3 (a)</i>        | rs743757                                                                               | Diastolic blood pressure                                                                                                  |
| rs465983                    | 5          | 55,812,130  | <i>MAP3K1 (a)</i>       | rs459193                                                                               | Type 2 diabetes                                                                                                           |
| rs34341                     | 5          | 74,934,009  | <i>ANKDD1B(c)</i>       | rs12654264, rs3846662, rs3846663, rs12916, rs6873472, rs4604177, rs5744672, rs10078021 | Diastolic blood pressure, LDL cholesterol levels, Total cholesterol levels, Metabolite levels                             |
| rs1317415                   | 5          | 157,952,404 | <i>RP11-32D16.1 (b)</i> | rs11953630                                                                             | Diastolic blood pressure, Systolic blood pressure                                                                         |
| rs2492863                   | 6          | 34,603,646  | <i>C6orf106 (b)</i>     | rs2814944, rs9469890, rs2764209, rs2814993, rs4472337                                  | Total cholesterol levels, Coronary artery disease, HDL cholesterol, Plateletcrit                                          |
| rs2635727                   | 6          | 50,820,940  | <i>TFAP2(a)</i>         | rs78648104                                                                             | Systolic blood pressure                                                                                                   |
| rs481806                    | 7          | 28,207,300  | <i>JAZF1 (a)</i>        | rs849134, rs849135, rs1708302                                                          | Type 2 diabetes                                                                                                           |
| rs2044387                   | 8          | 8,907,950   | <i>ERII (b)</i>         | rs7826238                                                                              | Systolic blood pressure                                                                                                   |
| rs12546366                  | 8          | 10,802,146  | <i>XKR6 (b)</i>         | rs1821002, rs6601530, rs11776767, rs10107145, rs7819412                                | Carotid intima media thickness, Triglycerides, Systolic blood pressure                                                    |
| rs8050894                   | 16         | 31,104,509  | <i>KAT8(c)</i>          | rs72799341, rs2032915                                                                  | Diastolic blood pressure, Triglyceride levels                                                                             |



|            |    |            |                          |                                                  |                                                                                                                                                                       |
|------------|----|------------|--------------------------|--------------------------------------------------|-----------------------------------------------------------------------------------------------------------------------------------------------------------------------|
| rs55872725 | 16 | 53,809,123 | <i>FTO</i> (a)           | rs9940128, rs8050136,<br>rs9939609, rs9936385    | Type 2 diabetes, metabolic syndrome                                                                                                                                   |
| rs28394864 | 17 | 47,450,775 | <b><i>ZNF652</i></b> (b) | rs12940887, rs62076439,<br>rs16948048, rs7502499 | Coronary artery disease, Diastolic blood pressure                                                                                                                     |
| rs71336392 | 18 | 57,850,927 | <i>MC4R</i> (a)          | rs663129, rs663640,<br>rs12967135, rs34633411    | C-reactive protein levels or triglyceride levels pleiotropy, Coronary artery disease, HDL cholesterol, C-reactive protein levels or HDL-cholesterol levels pleiotropy |
| rs10402308 | 19 | 19,657,500 | <i>GATAD2A</i> (a)       | rs3794991, rs17216525,<br>rs2304130, rs16996148  | Triglycerides, Total cholesterol, LDL cholesterol, Type 2 diabetes                                                                                                    |
| rs143384   | 20 | 34,025,756 | <i>GDF5</i> (a)          | rs6579245, rs2277862,<br>rs7264396, rs6120974    | Total cholesterol levels, Triglycerides                                                                                                                               |

\*The 'Locus' column denotes: (a) the reported gene from previous GWAS, (b) the most proximal gene, (c) the most strongly associated gene that is regulated by an eQTL in LD with the lead SNP, or (d) a gene containing a missense variant in LD with the lead SNP. Loci in bold type designate novel loci that have not been associated with an anthropometric trait in previous GWAS. All gene names are in italic font.

**Supplementary Table 8. Phenotypic correlation between body fat ratios and anthropometric traits.** Portion of variance in arm fat ratio (AFR), leg fat ratio (LFR) or trunk fat ratio (TFR) (the response variable) that can be explained (squared semi-partial correlation coefficients) by adding either BMI, height, waist-to-hip ratio (WHR), waist circumference (WC), WHR adjusted for BMI (WHRadjBMI), WC adjusted for BMI (WCadjBMI), or one of the other body fat ratios to linear regression models that include age and principal components. Analyses were performed in females and males separately. The signs (+) or (-) is included for all correlations that were significant after Bonferroni correction for the number of tests performed ( $P < 0.05/36$ ) and denote the directions of the effect-estimates.

| <i>Females</i>        | <b>BMI</b> | <b>Height</b> | <b>WHR</b> | <b>WC</b> | <b>WHRadjBMI</b> | <b>WCadjBMI</b> | <b>AFR</b> | <b>LFR</b> | <b>TFR</b> |
|-----------------------|------------|---------------|------------|-----------|------------------|-----------------|------------|------------|------------|
| Arm fat ratio (AFR)   | 78.9% (+)  | 7.3% (-)      | 15.3% (+)  | 54.3% (+) | 0.1% (-)         | 0.9% (-)        |            | 2.8% (-)   | 4.8% (-)   |
| Leg fat ratio (LFR)   | 12.2% (-)  | 16.0% (-)     | 4.1% (-)   | 17.4% (-) | 0.2% (-)         | 5.1% (-)        | 2.8% (-)   |            | 84.0% (-)  |
| Trunk fat ratio (TFR) | 0.002%     | 25.3% (+)     | 0.2% (+)   | 1.5% (+)  | 0.3% (+)         | 6.8% (+)        | 4.8% (-)   | 83.8% (-)  |            |
| <i>Males</i>          |            |               |            |           |                  |                 |            |            |            |
| Arm fat ratio (AFR)   | 4.8% (+)   | 1.1% (+)      | 0.001%     | 2.3% (+)  | 2.6% (-)         | 0.8% (-)        |            | 0.8% (+)   | 15.1% (-)  |
| Leg fat ratio (LFR)   | 0.2% (+)   | 0.7% (-)      | 0.003%     | 0.004%    | 0.2% (-)         | 1.0% (-)        | 0.8% (+)   |            | 86.2% (-)  |
| Trunk fat ratio (TFR) | 1.9% (-)   | 0.1% (+)      | 0.002%     | 0.4% (-)  | 1.0% (+)         | 1.6% (+)        | 15.4% (-)  | 83.6% (-)  |            |

**Supplementary Table 9. Genetic correlations between body fat ratios and anthropometric traits.** Genetic correlation ( $r_g$ ) was estimated by cross-trait LD-score regression<sup>2</sup> using summary statistics from GWAS for body fat ratios. The genetic correlations were squared for ease of comparison with supplementary Table 3. The signs (+) or (-) is included for all correlations that were significant after Bonferroni correction for the number of tests performed ( $P < 0.05/36$ ), and denote if the correlation is positive or negative

| <i>Females</i>        | <b>BMI</b> | <b>Height</b> | <b>WHR</b> | <b>WC</b> | <b>WHRadjBMI</b> | <b>WCadjBMI</b> | <b>AFR</b> | <b>LFR</b> | <b>TFR</b> |
|-----------------------|------------|---------------|------------|-----------|------------------|-----------------|------------|------------|------------|
| Arm fat ratio (AFR)   | 79.2% (+)  | 16% (-)       | 16.8% (+)  | 51.8% (+) | 0.6% (-)         | 9% (-)          |            | 0.25%      | 13% (-)    |
| Leg fat ratio (LFR)   | 9% (-)     | 42.3% (-)     | 3.2% (-)   | 24.0% (-) | 0.4%             | 18.5% (-)       | 0.25%      |            | 82.8% (-)  |
| Trunk fat ratio (TFR) | 0.81% (-)  | 60.8% (+)     | 0%         | 2.6% (+)  | 0.36%            | 28.1% (+)       | 13% (-)    | 82.8% (-)  |            |
| <i>Males</i>          |            |               |            |           |                  |                 |            |            |            |
| Arm fat ratio (AFR)   | 13.0% (+)  | 7.3% (+)      | 0.5%       | 10.2% (+) | 10.2% (-)        | 0.4% (-)        |            | 10.9% (-)  | 0.36%      |
| Leg fat ratio (LFR)   | 3.6% (+)   | 7.3% (-)      | 4.4% (+)   | 0.64%     | 0.64%            | 6.25% (-)       | 10.9% (-)  |            | 85% (-)    |
| Trunk fat ratio (TFR) | 14.4% (-)  | 2.9% (+)      | 7.8% (-)   | 6.8% (-)  | 0.25%            | 7.8% (+)        | 0.36%      | 85% (-)    |            |

**Supplementary Table 10. Body fat ratio-associated potentially damaging missense variants.**

| Lead SNP    | Chr | Position (bp) | Missense variant | Position (bp) | Distance to lead SNP (bp) | LD w. lead SNP (R2) | Gene                          | Amino acid substitution | SIFT* score             | Polyphen-2* score          |
|-------------|-----|---------------|------------------|---------------|---------------------------|---------------------|-------------------------------|-------------------------|-------------------------|----------------------------|
| rs4733727   | 8   | 130,731,484   | rs4144738        | 130,760,850   | 29,366                    | 0.91                | <i>GSDMC</i>                  | Met/Thr                 | deleterious             | probably damaging          |
| rs180921974 | 1   | 155,268,131   | rs72704117       | 155,175,089   | 93,042                    | 0.95                | <i>THBS3</i>                  | Ala/Thr                 | deleterious             | possibly damaging          |
| rs3817428   | 15  | 89,415,247    | lead SNP         |               |                           |                     | <i>ACAN</i>                   | Asp/Glu                 | deleterious             | benign - possibly damaging |
| rs72755233  | 15  | 100,692,953   | lead SNP         |               |                           |                     | <i>ADAMTS17</i>               | Thr/Ile                 | deleterious             | benign                     |
| rs115912456 | 5   | 82,815,158    | rs61749613       | 82,815,170    | 12                        | 1.00                | <i>VCAN</i>                   | Lys/Glu                 | tolerated - deleterious | possibly damaging          |
| rs9358913   | 6   | 26,239,404    | rs7766641        | 26,184,102    | 55,302                    | 0.82                | <i>HIST1H2BE</i>              | Gly/Ser                 | tolerated               | probably damaging          |
| rs351855    | 5   | 176,520,243   | lead SNP         |               |                           |                     | <i>FGFR4</i>                  | Gly/Arg                 | tolerated               | possibly damaging          |
| rs71420186  | 14  | 50,960,918    | rs12881869       | 50,923,249    | 37,669                    | 0.96                | <i>MAP4K5</i>                 | Ala/Thr                 | tolerated               | possibly damaging          |
| rs5779197   | 1   | 184,009,826   | rs2274432        | 184,020,945   | 11,119                    | 0.96                | <i>TSEN15</i>                 | Gly/Asp                 | tolerated               | benign - possibly damaging |
| rs143384    | 20  | 34,025,756    | rs224331         | 34,022,387    | 3,369                     | 0.73                | <i>GDF5;</i><br><i>GDF5OS</i> | Ala/Ser;<br>Ala/Glu     | tolerated               | benign - possibly damaging |
| rs62621197  | 19  | 8,670,147     | lead SNP         |               |                           |                     | <i>ADAMTS10</i>               | Arg/Gln                 | tolerated               | benign - possibly damaging |

\*Polyphen-2<sup>3</sup> and SIFT<sup>4</sup> scores were extracted from Ensembl ([www.ensembl.org](http://www.ensembl.org)). SIFT utilizes protein sequence data to predict the effects of a missense variant while Polyphen-2 also considers protein structure and evolutionary conservation. Polyphen-2 generates a probability that a missense mutation is damaging, while SIFT generates a probability that the amino acid change is tolerated. Polyphen-2 uses a tree-tiered prediction score: 0-0.15 is predicted to be benign, 0.15 to 0.85 possibly damaging and 0.85 -1.0 more confidently predicted to be damaging (i.e., probably damaging). A SIFT score < 0.05 is predicted to be deleterious<sup>4</sup>. Polyphen-2 and SIFT scores are presented as ranges in the cases where they differ due to being part of different transcript variants.

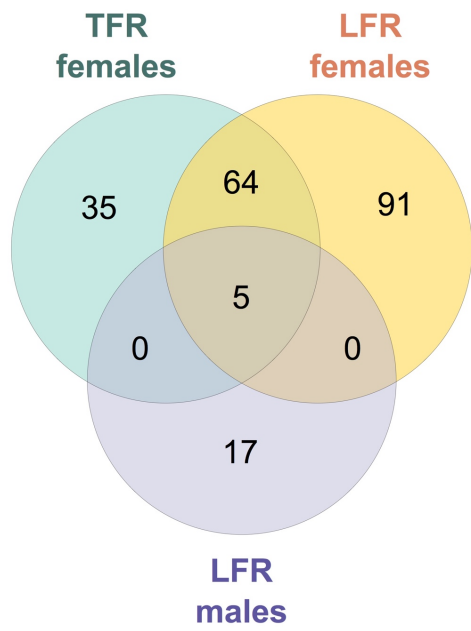

**Supplementary Figure 5. Overlap of enriched gene sets from DEPICT for body fat ratios.** This figure shows the number of gene sets that were enriched for each body fat ratio in DEPICT analyses and the overlap of gene sets between traits.

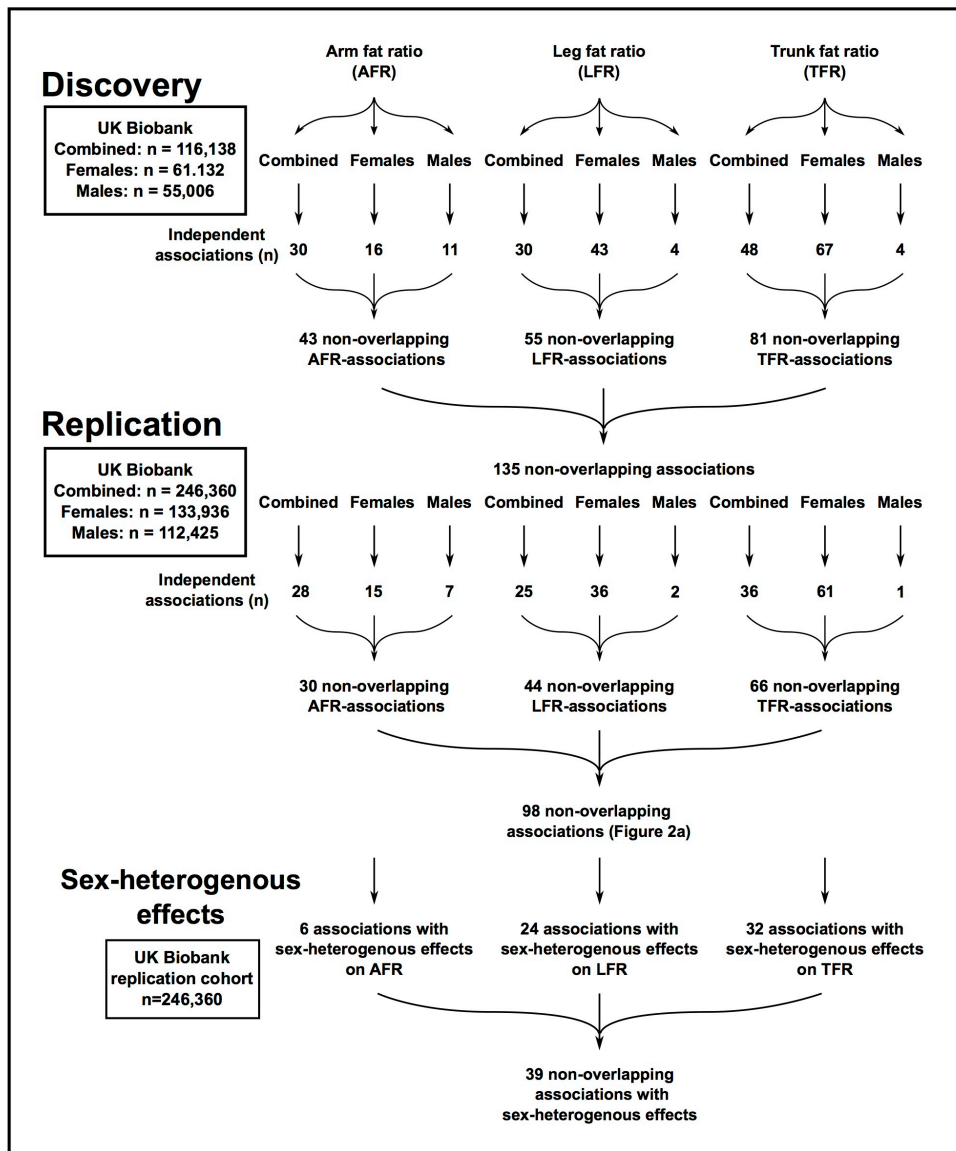

**Supplementary Figure 6. Flowchart of the genetic analyses of body-fat ratios.** GWAMA was used to detect heterogeneity in genetic effects between sexes<sup>5</sup>.

## References

1. Bulik-Sullivan, B. *et al.* LD score regression distinguishes confounding from polygenicity in genome-wide association studies. *Nat. Genet.* **47**, 291–295 (2015).
2. Bulik-Sullivan, B. *et al.* An atlas of genetic correlations across human diseases and traits. *Nat. Genet.* **47**, 1236–1241 (2015).
3. Adzhubei, I., Jordan, D. M. & Sunyaev, S. R. *Predicting functional effect of human missense mutations using PolyPhen-2. Current Protocols in Human Genetics* (2013). doi:10.1002/0471142905.hg0720s76
4. Ng, P. C. & Henikoff, S. SIFT : predicting amino acid changes that affect protein function. **31**, 3812–3814 (2003).
5. Magi, R., Lindgren, C. M. & Morris, A. Meta-Analysis of Sex-Specific Genome-Wide Association Studies. *Genet. Epidemiol.* 846–853 (2010). doi:10.1002/gepi.20540
